# Supplementary material for: Visual–motor integration and fine motor skills at 6½ years of age and associations with neonatal brain volumes in children born extremely preterm in Sweden: a population-based cohort study
Source: PubMed Central journal article supplement — BMJ Open. 2018 Feb 17;8(2):e020478. doi: 10.1136/bmjopen-2017-020478 (PMC5855250; doi:10.1136/bmjopen-2017-020478), 2018-02-17
Supplement: bmjopen-2017-020478.draft_revisions.pdf [file bmjopen-2017-020478.draft_revisions.pdf]

# BMJ Open

BMJ Open is committed to open peer review. As part of this commitment we make the peer review history of every article we publish publicly available.

When an article is published we post the peer reviewers' comments and the authors' responses online. We also post the versions of the paper that were used during peer review. These are the versions that the peer review comments apply to.

The versions of the paper that follow are the versions that were submitted during the peer review process. They are not the versions of record or the final published versions. They should not be cited or distributed as the published version of this manuscript.

BMJ Open is an open access journal and the full, final, typeset and author-corrected version of record of the manuscript is available on our site with no access controls, subscription charges or pay-per-view fees (<http://bmjopen.bmj.com>).

If you have any questions on BMJ Open's open peer review process please email [info.bmjopen@bmj.com](mailto:info.bmjopen@bmj.com)

# BMJ Open

## Visual-motor integration and fine motor skills in children born extremely preterm: associations with neonatal brain volumes

|                                 |                                                                                                                                                                                                                                                                                                                                                                                                                                                                                                                                                                                                           |
|---------------------------------|-----------------------------------------------------------------------------------------------------------------------------------------------------------------------------------------------------------------------------------------------------------------------------------------------------------------------------------------------------------------------------------------------------------------------------------------------------------------------------------------------------------------------------------------------------------------------------------------------------------|
| Journal:                        | <i>BMJ Open</i>                                                                                                                                                                                                                                                                                                                                                                                                                                                                                                                                                                                           |
| Manuscript ID                   | bmjopen-2017-020478                                                                                                                                                                                                                                                                                                                                                                                                                                                                                                                                                                                       |
| Article Type:                   | Research                                                                                                                                                                                                                                                                                                                                                                                                                                                                                                                                                                                                  |
| Date Submitted by the Author:   | 06-Nov-2017                                                                                                                                                                                                                                                                                                                                                                                                                                                                                                                                                                                               |
| Complete List of Authors:       | Bolk, Jenny; Department of Women's and Children's Health, Karolinska Institutet; Sachs's Children and Youth Hospital, Sachsska barnsjukhuset, Stockholms läns landsting<br>Padilla, Nelly; Karolinska Institutet, Department of Women's and Children's Health<br>Forsman, Lea; Karolinska Institutet, Department of Women's and Children's Health<br>Brostrom, L; Karolinska Institutet, Department of Women's and Children's Health<br>Hellgren, Kerstin; Karolinska institutet, Department of Clinical Neuroscience<br>Åden, Ulrika; Karolinska institutet, Department of Women's and Children's Health |
| <b>Primary Subject Heading</b>: | Paediatrics                                                                                                                                                                                                                                                                                                                                                                                                                                                                                                                                                                                               |
| Secondary Subject Heading:      | Neurology                                                                                                                                                                                                                                                                                                                                                                                                                                                                                                                                                                                                 |
| Keywords:                       | outcome, extremely preterm born child, brain development, school-age, visual-motor integration, fine motor skills                                                                                                                                                                                                                                                                                                                                                                                                                                                                                         |
|                                 |                                                                                                                                                                                                                                                                                                                                                                                                                                                                                                                                                                                                           |

SCHOLARONE™  
Manuscripts

1  
2  
3 **Visual-motor integration and fine motor skills in children born extremely**  
4  
5 **preterm: associations with neonatal brain volumes**  
6  
7  
8  
9

10 Jenny Bolk, M.D.<sup>1,2</sup>, Nelly Padilla M.D, PhD<sup>1</sup>, Lea Forsman, PhD<sup>1</sup>, Lina Broström,  
11  
12 M.D.<sup>1</sup>, Kerstin Hellgren, M.D., PhD<sup>3,4</sup>, Ulrika Åden M.D, PhD<sup>1,5</sup>  
13  
14

15 **Corresponding author:** Jenny Bolk, Sachs' Children and Youth Hospital,  
16  
17 Södersjukhuset, SE-118 83 Stockholm, Sweden. Email: jenny.bolk@ki.se Telephone  
18  
19 number: +46-7-4356585. Fax number: Fax: +46851777353  
20  
21

22  
23  
24 <sup>1</sup>Department of Women's and Children's Health, Karolinska Institutet, <sup>2</sup>Sachs'  
25  
26 Children and Youth Hospital, <sup>3</sup>Department of Clinical Neuroscience, Karolinska  
27  
28 Institutet, <sup>4</sup>Neuropediatric Department, Astrid Lindgren Children's Hospital,  
29  
30 Karolinska University Hospital, <sup>5</sup>Neonatal Unit, Astrid Lindgren Children's Hospital,  
31  
32 Karolinska University Hospital, Stockholm, Sweden  
33  
34

35  
36  
37 **Key words:** Brain development, Extremely Preterm, Outcome, School-age  
38  
39  
40  
41

42 **Word count:** 3412 words  
43  
44  
45  
46  
47  
48  
49  
50  
51  
52  
53  
54  
55  
56  
57  
58  
59  
60

## Abstract

### *Objectives*

This exploratory study aimed to investigate associations between neonatal brain volumes and visual-motor integration (VMI) and fine motor skills in children born EPT when they reached 6.5 years of age.

### *Setting*

Prospective population-based cohort study in Stockholm, Sweden, during three years.

### *Participants*

All children born before gestational age 27 weeks 2004-2007 in Stockholm, without major morbidities and impairments, and who underwent magnetic resonance imaging at term-equivalent age.

### *Main outcome measures*

Brain volumes were calculated using morphometric analyses in regions known to be involved in VMI and fine motor functions. VMI was assessed with The Beery-Buktenica Developmental Test of Visual-Motor Integration - Sixth Edition and fine motor skills were assessed with the manual dexterity subtest from the Movement Assessment Battery for Children-Second Edition, at 6.5 years. Associations between the brain volumes and VMI and fine motor skills were evaluated using partial correlation, adjusted for total cerebral parenchyma and sex.

### *Results*

Out of 107 children born at gestational age <27 weeks, 83 were assessed at 6.5 years and 66/83 were without major brain lesions or cerebral palsy and included in the analyses. A representative subsample underwent morphometric analyses: automatic segmentation (n=34) and atlas-based segmentation (n=26). The precentral

gyrus was associated with both VMI ( $r=0.54$ ,  $p=0.007$ ) and fine motor skills ( $r=0.54$ ,  $p=0.01$ ). Associations were also seen between fine motor skills and the volume of the cerebellum ( $r=0.42$ ,  $p=0.02$ ), brainstem ( $r=0.47$ ,  $p=0.008$ ) and grey matter ( $r=-0.38$ ,  $p=0.04$ ).

### *Conclusions*

Neonatal brain volumes in areas known to be involved in VMI and fine motor skills were associated with scores for these two functions when children born EPT without major brain lesions or cerebral palsy were evaluated at 6.5 years of age. Establishing clear associations between early brain volume alterations and later VMI and/or fine motor skills could make early interventions possible.

### **Strengths and limitations of this study**

- This was a robust population-based cohort study design that used advanced magnetic resonance imaging techniques and established assessment tools
- It studied visual-motor integration and fine motor skills in extremely preterm born children at 6.5 years, which is an important age for Swedish school children
- Although we had to exclude numerous children from the morphometric analyses, due to strict data quality criteria, the sample was representative of the cohort
- We were unable to include a control group of children born at term in the analyses

## Funding

This work was supported by the Swedish Medical Research Council (grant numbers 523-2011-3981), the regional agreement on medical training and clinical between Stockholm County Council and the Karolinska Institutet (grant number ALF-20140316, 20100646 and 20150876), the Marianne and Marcus Wallenberg foundation (grant number 2011.0085), the Swedish Order of Freemasons in Stockholm, the Swedish Medical Society, the Swedish Brain Foundation (grant number FP2017-0131), Linnéa and Josef Carlssons Stiftelse, Sachs' Children and Youth Hospital, Stiftelsen Samariten, H.K.H. Kronprinsessan Lovisas Förening för barnsjukvård, Sällskapet Barnavård, the Sigvard & Marianne Bernadotte Research Foundation for Children Eye Care and the Märta and Gunnar Philipson foundation. U Ådén was supported by Stockholm County Council (clinical research appointment). The study sponsors had no role in the study design, collection, analysis or interpretation of data, writing the report or the decision to submit the article for publication.

**Competing interests:** None

## Introduction

Visual-motor function is an important cross-modal ability that involves the integration of visual function and perception, eye-hand coordination, fine motor skills and visual-motor integration (VMI) <sup>1</sup>. Studies have shown that VMI can predict a child's future hand-writing skills <sup>2-4</sup> and academic performance in reading, writing and mathematics <sup>5</sup>. Evaluating VMI performance is therefore an important component of the test batteries that are used to detect children who risk school problems. Fine motor skills are a fundamental component of hand and visual-motor function, which also

1  
2  
3 contributes to school performance<sup>6</sup>. Several reports have shown that children born  
4 preterm have poor VMI and motor function<sup>7 8-10</sup> and it is well known that this group of  
5 children risk poor school performance and learning disabilities<sup>11-13</sup>.  
6  
7  
8

9  
10 Although problems with VMI can stem from any of the underlying abilities listed  
11 above, when VMI and motor abilities have been investigated together, and  
12 perceptual and general cognitive abilities have been held constant, children with  
13 lower general motor scores are seen to have lower VMI scores<sup>14</sup>. Children born very  
14 low birth weight show a similar pattern<sup>15</sup>: VMI showing stronger relationships with  
15 motor ability than with visual perception, suggesting that motor skills and manual fine  
16 motor skills in particular, are crucial components underlying VMI. On the other hand,  
17 visual perceptual deficits in children born EPT are well documented<sup>7</sup> and their role in  
18 VMI should not be underestimated. Therefore, an inductive exploration of brain  
19 areas associated with VMI is a useful approach, especially when investigating  
20 potentially atypical brain development trajectories<sup>16</sup>.  
21  
22  
23  
24  
25  
26  
27  
28  
29  
30  
31  
32  
33

34 It is largely unknown how the developmental alterations of the brain affect VMI and  
35 fine motor skills in children born preterm. However, we have previously reported that  
36 neonatal brain volumes are affected in preterm infants<sup>17</sup>, and other researchers have  
37 shown that these alterations in preterm brain volumes persist until at least early  
38 childhood<sup>18</sup>. Volumetric alterations in the brain have also been associated with  
39 neurodevelopmental outcomes in preterm born children<sup>19 20</sup>. However, the  
40 relationship between volume alterations in the brains of children born extremely  
41 (EPT), at less than 27 weeks of gestation, and VMI and fine motor skills at school  
42 age remains largely unexplored. We hypothesized that early brain volume alterations  
43 would be related to later VMI and fine motor skills in such children. To explore these  
44 possible associations, we used atlas-based and automatic segmentation to measure  
45  
46  
47  
48  
49  
50  
51  
52  
53  
54  
55  
56  
57  
58  
59  
60

1  
2  
3 the brain volumes at term-equivalent age, and carried out a clinical evaluation of VMI  
4  
5 and fine motor skills at the age of 6.5 years.  
6

## 7 8 **Methods**

### 9 10 ***Study population***

11  
12 The study population was a sub-cohort of the Extremely Preterm Infants in Sweden  
13  
14 Study (EXPRESS) cohort. EXPRESS was a prospective national population-based  
15  
16 cohort study which invited all children born in Sweden at a gestational age (GA) of  
17  
18 less than 27 weeks over a three-year period to take part in clinical follow ups at 2.5  
19  
20 and 6.5 years of age<sup>21 22</sup>. The present study included 107 children born in Stockholm  
21  
22 between January 1 2004 and March 31 2007, without chromosomal aberrations,  
23  
24 congenital malformations or infections, who had undergone magnetic resonance  
25  
26 imaging (MRI) of the brain at term equivalent age.  
27

28  
29 Gestational age was assessed by maternal ultrasound at around a GA of 18 weeks  
30  
31 and perinatal and neonatal data were prospectively collected from the children's  
32  
33 medical records. Cranial ultrasound was performed on a regular basis during the  
34  
35 neonatal period up to a GA of 40 weeks, according to our clinical routine. Children  
36  
37 were excluded from the analyses in the present study if they had major brain lesions  
38  
39 defined as intraventricular hemorrhage, periventricular leukomalacia, severe white  
40  
41 matter score according to Inder<sup>23</sup> or hydrocephalus, or cerebral palsy (CP) as  
42  
43 defined by the Surveillance of Cerebral Palsy in Europe Working Group<sup>24</sup>. All  
44  
45 children had been screened for retinopathy of prematurity and evidence-based  
46  
47 treatment had been administered<sup>25</sup>.  
48  
49

50  
51 The study was approved by the local ethics committee in Stockholm and the parents  
52  
53 of all the children gave their written, informed consent before the study.  
54  
55

### 56 ***Assessment at 6.5 years of age***



1  
2  
3 Visual-motor integration was assessed using the Beery-Buktenica Developmental  
4 Test of Visual-Motor Integration - sixth edition <sup>26</sup>. This test consists of 30 geometrical  
5 shapes that the child is asked to copy with a pen and paper and it is terminated when  
6 three figures in a row have been incorrectly copied. The drawings are examined and  
7 acceptable approximations of the model drawings are each given one point. The raw  
8 score is the total number of correct drawings and this is then transformed to an age-  
9 corrected standard score. Standard scores were used in the analyses in this study.  
10  
11 The normative mean score is 100 with a standard deviation (SD) of 15.  
12  
13

14  
15 Fine motor skills were assessed with the manual dexterity subtest of the Movement  
16 Assessment Battery for Children – Second edition (M-ABC-2) which measures  
17 unimanual speed, bimanual coordination and unimanual spatial accuracy <sup>27</sup>. Age-  
18 adjusted standard scores were used for the analyses. The reference mean score is  
19 10 with a standard deviation of 3, and scores below 7 indicate definitive or borderline  
20 motor problems.  
21  
22

23  
24 Binocular visual acuity was measured with habitual correction at three meters with  
25 the Lea Hyvärinen chart <sup>28</sup>. Visual impairment was defined as a visual acuity of less  
26 than 0.33 in the better eye.  
27  
28  
29  
30  
31  
32

### 33 ***MRI data acquisition and processing***

34  
35 All the children were scanned using a Philips Intera 1.5 Tesla MRI system (Philips  
36 International, Amsterdam, The Netherlands) at term equivalent age. A sagittal T1-  
37 weighted turbo spin echo sequence, an axial inversion recovery sequence and an  
38 axial T2-weighted sequence were run. The three-dimensional T1-weighted images  
39 were acquired with an echo time of 4.6 msec, a repetition time of 40 msec, a flip  
40 angle of 30°, a voxel size of 0.7 × 0.7 × 0.1 mm and a field of view of 180mm. The  
41 MRI protocol has previously been reported <sup>29</sup>. Quality assurance was considered  
42  
43  
44  
45  
46  
47  
48  
49  
50  
51  
52  
53  
54  
55  
56  
57  
58  
59  
60

1  
2  
3 important in order to obtain accurate data, even though this meant that we were left  
4 with a relatively small sample size. The imaging data was checked for quality, based  
5 on a visual inspection of the raw data sets, and the reasons for low imaging quality  
6 are presented in **Figure 1**.  
7  
8  
9

### 10 11 12 ***Atlas based segmentation*** 13

14 The brain was divided into 90 anatomical regions, by adapting an automated  
15 anatomical labelling neonatal atlas<sup>30</sup>, as previously described<sup>17</sup>. Briefly, the intensity  
16 image that generated the neonatal atlas was registered to the T1-weighted image of  
17 each infant, then the generated deformation field was used to transform the label  
18 map with 90 regions from the atlas space to the subject space. A visual inspection  
19 was performed for each subject and each step.  
20  
21  
22  
23  
24  
25  
26

27 We selected brain regions that had been previously described as being in the  
28 networks that mediate VMI and fine motor skills, namely the visual, salience, sensory  
29 motor and default mode networks<sup>31-33</sup>. We also considered the subcortical regions:  
30 pallidum, putamen, caudate and thalamus. The volume of each brain region was  
31 determined by adding together the volumes of their components.  
32  
33  
34  
35  
36  
37  
38

### 39 ***Automatic segmentation*** 40

41 We first performed automatic segmentation of brain tissues (T1-weighted images)  
42 using SPM8 software (<http://www.fil.ion.ucl.ac.uk/spm>), running on MATLAB version  
43 7.5 (MathWorks, Natick, Massachusetts, USA). This process focused on specific  
44 neonatal priors, including grey matter, white matter, cerebrospinal fluid, deep grey  
45 matter, the cerebellum and brainstem, which have previously been described in detail  
46  
47  
48  
49  
50  
51  
52  
53  
54  
55  
56  
57  
58  
59  
60

34<sup>35</sup>. We then applied a Diffeomorphic Anatomical Registration Through an  
Exponential Lie algebra algorithm (DARTEL) to improve the inter-subject registration  
<sup>36</sup>. Finally, all the images were modulated. The Easy Volume Toolbox<sup>37</sup> was used to

1  
2  
3 extract the global brain tissue volumes from the segmented, normalized and  
4  
5 modulated images of each child.  
6  
7

### 8 ***Statistical analyses***

9  
10 The analyses were carried out with SPSS for Windows, version 22.0 (SPSS Inc,  
11  
12 Chicago, Illinois, USA) and the data were checked for normality, homogeneity and  
13  
14 outliers. In order to compare the groups, we used the Student's t-test and Mann  
15  
16 Whitney U test for continuous variables and the chi-square test or Fisher's exact test  
17  
18 for categorical data, as appropriate. The associations between brain volumes, VMI  
19  
20 scores and fine motor skills scores were explored using partial correlation. Total  
21  
22 cerebral parenchyma (CPAR) – the sum of the grey matter and white matter,  
23  
24 excluding cerebrospinal fluid - was used as a covariate to control for generalized  
25  
26 scaling effects. Because sex, GA at birth and the GA at the time of the scan have  
27  
28 previously been shown to influence brain volume size in preterm children<sup>38 39</sup> we  
29  
30 performed the analyses with different covariate pairs. First we used CPAR and GA at  
31  
32 birth, then we used CPAR and the GA at scan and finally we used CPAR and sex.  
33  
34 GA at birth and GA at scan did not influence the results, but sex did, so CPAR and  
35  
36 sex were chosen as the covariates in the final model. There was one multivariate  
37  
38 outlier which was identified by the Mahalanobis distance when we investigated the  
39  
40 atlas segmentation data in relation to the fine motor skills scores, and this child was  
41  
42 excluded from those analyses. Bonferroni's correction for multiple comparisons was  
43  
44 not applied because of the exploratory nature of the study and the reduced sample  
45  
46 size examined<sup>40-42</sup>. The level of significance was set at a two-sided p-value of <0.05.  
47  
48  
49  
50  
51  
52

## 53 **Results**

### 54 ***Study population***

1  
2  
3 A summary of the study population is presented in **Figure 1** and their perinatal  
4 characteristics are presented in **Table 1**. At the time of the scan, the median (range)  
5 GA in the 66 children without major brain lesions or CP was 40.8 (39.1-45.3) weeks  
6 and for the assessment of VMI and fine motor skills it was 6 years 5 months (6 years  
7 3 months - 7 years 2 months).

8  
9  
10  
11  
12  
13 The subsample of 34 children with high-quality MRI scans was representative of the  
14 whole cohort with regard to their perinatal and neonatal characteristics, findings on  
15 structural MRI, gestational age at MRI, age at assessment at 6.5 years and mean  
16 VMI and fine motor score (**Supplementary Table 1**). During the atlas-based  
17 segmentation process, 8 subjects had co-registration failure, leaving 26 children in  
18 the final sample. These 26 children were also representative of the cohort of 66  
19 children with regard to the above characteristics, except for days on mechanical  
20 ventilation, which was a median (range) of 3 (0-36) days for the sub-sample versus  
21 10 (0-55) days for the other children ( $p=0.04$ ) (**Supplementary Table 2**).

### 32 33 34 35 ***Assessment at 6.5 years of age***

36  
37 The mean (SD) VMI standard score for the 66 children without major brain lesions or  
38 CP was 93 (10), 7 points (0.5 SD) below the norm. The mean (SD) VMI scores for  
39 the 29 girls was higher than for the 37 boys: mean (SD) at 96 (10) versus 90 (8),  
40 respectively ( $p=0.02$ ).

41  
42  
43  
44  
45  
46 The mean (SD) fine motor skills score was 8 (3), which was 2 points (0.5 SD) below  
47 the norm, and there were no significant sex differences as the girls scored 8 (3) and  
48 the boys 7 (3) ( $p=0.16$ ).

49  
50  
51  
52  
53  
54  
55  
56  
57  
58  
59  
60  
None of the children included in the study had a visual impairment.

### ***Brain volumes and associations with VMI and fine motor skills***

We identified a number of regions that demonstrated significant associations between brain volumes, VMI and fine motor skills scores. VMI performance showed a positive correlation with the volume of the precentral gyrus (partial  $r=0.54$ ,  $p=0.007$ ), whereas the fine motor skills scores showed a positive correlation with the volumes of the precentral gyrus (partial  $r = 0.54$ ,  $p=0.01$ ), the cerebellum (partial  $r = 0.42$ ,  $p=0.02$ ) and the brainstem (partial  $r = 0.47$   $p=0.008$ ) and a negative correlation with cortical grey matter volume (partial  $r = -0.38$ ,  $p=0.04$ ) (**Figure 2**). All the correlation analyses can be found in **Supplementary Table 3**.

### **Discussion**

In this study, the associations between brain volumes at term equivalent age and VMI and fine motor skills at 6.5 years in children born EPT without major brain lesions or CP were explored in regions of the brain previously reported to be involved in those functions. The volume of the precentral gyrus showed a positive correlation with both VMI and fine motor skills, and the volumes of the cerebellum and the brainstem correlated positively to fine motor skills. Total cortical grey matter volume showed a negative correlation with fine motor skills.

The group scores for the children included in this study were below the test norms on both VMI and fine motor skills, which was in line with previous studies where children born preterm have consistently shown poorer VMI performance and fine motor skills compared to children born at term<sup>7 43</sup>. However, the lower group performance is still considered to be within low average range. Within this relatively well-functioning group of children born EPT, we found a small, but statistically significant, difference between the sexes with regards to VMI performance, with girls outperforming boys. Sex differences in VMI performance have consistently been reported in children born

1  
2  
3 preterm<sup>7</sup> and MRI studies of children born preterm have revealed differences  
4 between the sexes in brain volumes and the microstructure of the brain<sup>38 44 45</sup>,  
5  
6 indicating altered early development of the brain in boys born preterm. This indicates  
7 that the brain of preterm born boys develops in an altered way compared to preterm  
8 born girls, affecting both the structure and the function of the brain.  
9  
10  
11  
12  
13

14 Cerebellar underdevelopment, with reductions in cerebellar volume, and sustained  
15 white matter injuries in children born preterm, have been suggested as possible  
16 mechanisms for poor visuo-motor function<sup>46 9 33</sup>, although many neural networks  
17 comprised of other neural structures have also been proposed to be involved in VMI  
18 including the visual, motor, sensory, salience and default mode networks, the  
19 subcortical regions and the brain stem<sup>47 48</sup>. Even though this study is the first, to our  
20 knowledge, to explore the associations between brain volumes at term equivalent  
21 age and VMI at 6.5 years in a cohort of children born EPT, there have been previous  
22 reports of associations between brain volumes and VMI performance in more mature  
23 preterm children. In these reports, positive correlations were seen between the  
24 growth rate of the caudate and the thalamus during the neonatal period and VMI  
25 scores at 4 years of age<sup>31</sup>, and between thalamic and cerebellar white matter  
26 volumes and VMI scores at 15 years of age<sup>32</sup>. We did not find these associations in  
27 our cohort and this finding was in line with a previous study that evaluated 8-year-old  
28 children born preterm<sup>49</sup>. One explanation for these different results could be  
29 individual childhood growth trajectories and different gestational ages in the various  
30 study cohorts. Additional studies using inductive (exploration) and deductive  
31 (hypotheses-driven) approaches will be useful in determining the relationships  
32 between VMI and neural structure.  
33  
34  
35  
36  
37  
38  
39  
40  
41  
42  
43  
44  
45  
46  
47  
48  
49  
50  
51  
52  
53  
54  
55  
56  
57  
58  
59  
60

1  
2  
3 VMI performance is dependent on fine motor skills. And, fine motor skills have been  
4  
5 shown to be a facilitator of visuo-motor function even though the causality of this  
6  
7 mediation is not known <sup>46</sup>. The present study revealed positive correlations between  
8  
9 better fine motor skills and larger volumes of the precentral gyrus, the cerebellum and  
10  
11 the brainstem - motor areas of the brain that have been reported to be involved in  
12  
13 fine motor skills <sup>50</sup>. The precentral gyrus, which is located in the frontal lobe, is the  
14  
15 origin of the corticospinal tracts known to affect motor functions. A smaller precentral  
16  
17 gyrus could, therefore, be expected to be correlated with reduced motor performance  
18  
19 and also to diminished VMI performance, in line with our findings, since fine motor  
20  
21 skills have been shown to be a mediator of visuo-motor function, even though the  
22  
23 cause of this mediation is not known <sup>46</sup>. Both the cerebellum and the brain stem are  
24  
25 important for fine motor skills and VMI, as well as for other tasks that rely on the  
26  
27 motor system <sup>47</sup>, and our results support their important role in this cross-modal  
28  
29 function. In addition, the cerebellum has long been known to be involved in  
30  
31 movement modulation, balance and coordination, and there is now evidence that it is  
32  
33 also important for a number of cognitive functions, including visuospatial attention <sup>51</sup>.  
34  
35 Finally, cerebellar growth has been shown to relate to visual perception at school age  
36  
37 in children born very preterm <sup>52</sup> and specific sub-regional volumes of the cerebellum  
38  
39 have been shown to be related to VMI and influenced by other perinatal factors, such  
40  
41 as pain and infections<sup>52</sup>. Taken together, the literature suggests that neurocorrelates  
42  
43 for fine motor skills are important for VMI performance as well, whether the  
44  
45 neurocorrelates are contributing to VMI performance directly, or indirectly, through  
46  
47 fine motor skills. The current findings suggest that the brain growth of the precentral  
48  
49 gyrus, cerebellum and brainstem have already altered during the neonatal period and  
50  
51 that this affects functions such as VMI and fine motor skills.  
52  
53  
54  
55  
56  
57  
58  
59  
60

1  
2  
3 We were surprised to find a negative correlation between cortical grey matter volume  
4 and fine motor skills in our cohort, despite the fact that Keunen et al reported a  
5 similar finding. Those authors also reported an inverse relationship between cortical  
6 grey matter volume and fine motor function when children who were born preterm  
7 reached 2.5 years<sup>20</sup>. Measuring the cortical grey volume depends on the  
8 segmentation methods used to separate grey matter from the cerebellum which could  
9 make the classifying cortical grey matter volume imprecise. It is also possible that  
10 atypical patterns of brain development play a role in the grey matter volume and fine  
11 motor skills relationship, in the preterm brain<sup>16</sup>.

12  
13  
14  
15  
16  
17  
18  
19  
20  
21  
22  
23 A strength of this study is its population-based prospective cohort study design. The  
24 study focused on children born EPT without major brain lesions, which meant that our  
25 cohort was relatively healthy. This was reflected in their average range performances  
26 on both the VMI and the fine motor skills tests, with a mean of only -0.5 SD below the  
27 norms, which is higher than previously reported in preterm populations. This study  
28 also has several limitations. We had to exclude many children from the morphometric  
29 analyses, due to the strict criteria for data quality, and this was a reflection of the  
30 well-known difficulties in processing neonatal MRI images in children born EPT. This  
31 left us with a relatively small sample size, although the children with morphometric  
32 data were largely representative of the whole cohort. Visual-motor integration was  
33 assessed with the main Beerys VMI test, but did not include the supplementary tests  
34 of visual perception and motor coordination which could have enabled us to  
35 distinguish between visual perception and fine motor function with regard to the VMI  
36 function. Finally, we were not able to include a control group of children born at term.

### 37 38 39 40 41 42 43 44 45 46 47 48 49 50 51 52 53 *Conclusion*

54  
55 In summary, this study found positive correlations between VMI performance, fine  
56  
57  
58  
59  
60



1  
2  
3 motor skills and brain volumes at term-equivalent age in regions that were already  
4 known to be involved in these functions. To our knowledge, this is the first study to  
5 examine the relationship between neonatal brain volumes and VMI and fine motor  
6 skills at the age of 6.5 years in a population-based cohort of children born EPT.  
7  
8 Further studies including larger sample sizes are needed to confirm our results, to  
9 explore the relationships between the underlying visual and motor modalities and  
10 VMI in greater depth, and to examine the potential use of early regional brain  
11 volumes as imaging biomarkers related to VMI and fine motor skills. Since it has  
12 been reported that early interventions can improve VMI in general school populations  
13 <sup>53</sup> as well as in children born preterm <sup>54</sup>, a possibility of early identification of children  
14 at risk could diminish the impact of preterm birth on these functions.  
15  
16

17  
18  
19  
20  
21  
22  
23  
24  
25  
26  
27 **Ethical approval:** All procedures performed in studies involving human participants  
28 were in accordance with the ethical standards of the institutional and/or national  
29 research committee and with the 1964 Helsinki declaration and its later amendments  
30 or comparable ethical standards.  
31  
32  
33  
34

35  
36  
37 **Informed consent:** Informed consent was obtained from the parents of all individual  
38 participants included in the study.  
39  
40

41  
42 **Author's contributions:**

43  
44 J Bolk designed the study, collected data, performed analyses, interpreted the data,  
45 drafted and revised the manuscript and approved the final version.  
46  
47

48 N Padilla designed the study, collected data, performed analyses, interpreted the  
49 data, revised the manuscript and approved the final version.  
50  
51

52 L Broström collected data, interpreted data, revised the manuscript and approved the  
53 final version.  
54  
55  
56  
57  
58  
59  
60

1  
2  
3 L Forsman collected data, interpreted data, revised the manuscript and approved the  
4  
5 final version.

6  
7 K Hellgren collected data, interpreted data, revised the manuscript and approved the  
8  
9 final version.

10  
11 U Åden designed the study, collected data, interpreted the data, revised the  
12  
13 manuscript and approved the final version  
14

## 15 16 **Acknowledgements**

17  
18  
19 We sincerely thank all the participating children and parents for making this study  
20  
21 possible.

22  
23  
24 We want to thank our research nurse Lena Swartling-Schlinzig and our psychologist  
25  
26 Eva Eklöf, the NeoBIG group and the EXPRESS group.  
27

28  
29  
30 **Abbreviations:** *Cerebral palsy (CP), Sum of grey and white matter excluding*  
31  
32 *cerebrospinal fluid (CPAR), Extremely Preterm Born (EPT), Gestational age (GA),*  
33  
34 *Magnetic Resonance Imaging (MRI), Movement Assessment Battery for Children-2*  
35  
36 *(M-ABC), Standard Deviation (SD), Visual-motor integration (VMI)*  
37

38  
39  
40 **Data sharing statement:** Any requests for data sharing should be addressed to  
41  
42 author U.Å.  
43

## 44 45 **References**

- 46  
47 1. Aylward GP. Neurodevelopmental outcomes of infants born prematurely. *Journal*  
48 *of developmental and behavioral pediatrics* : *JDBP* 2005;26(6):427-40.  
49 [published Online First: 2005/12/14]  
50 2. Daly CJ, Kelley GT, Krauss A. Relationship between visual-motor integration and  
51 handwriting skills of children in kindergarten: a modified replication study. *The*  
52 *American journal of occupational therapy* : *official publication of the American*  
53 *Occupational Therapy Association* 2003;57(4):459-62. [published Online First:  
54 2003/08/13]  
55  
56  
57  
58  
59  
60

3. Volman MJ, van Schendel BM, Jongmans MJ. Handwriting difficulties in primary school children: a search for underlying mechanisms. *The American journal of occupational therapy : official publication of the American Occupational Therapy Association* 2006;60(4):451-60. [published Online First: 2006/08/19]
4. Weil MJ, Amundson SJ. Relationship between visuomotor and handwriting skills of children in kindergarten. *The American journal of occupational therapy : official publication of the American Occupational Therapy Association* 1994;48(11):982-8. [published Online First: 1994/11/01]
5. Sortor JM, Kulp MT. Are the results of the Beery-Buktenica Developmental Test of Visual-Motor Integration and its subtests related to achievement test scores? *Optometry and vision science : official publication of the American Academy of Optometry* 2003;80(11):758-63. [published Online First: 2003/11/25]
6. Vuijk PJ, Hartman E, Mombarg R, et al. Associations between academic and motor performance in a heterogeneous sample of children with learning disabilities. *Journal of learning disabilities* 2011;44(3):276-82. doi: 10.1177/0022219410378446 [published Online First: 2011/04/28]
7. Geldof CJ, van Wassenaer AG, de Kieviet JF, et al. Visual perception and visual-motor integration in very preterm and/or very low birth weight children: a meta-analysis. *Research in developmental disabilities* 2012;33(2):726-36. doi: 10.1016/j.ridd.2011.08.025 [published Online First: 2011/11/26]
8. Williams J, Lee KJ, Anderson PJ. Prevalence of motor-skill impairment in preterm children who do not develop cerebral palsy: a systematic review. *Dev Med Child Neurol* 2010;52(3):232-7. doi: 10.1111/j.1469-8749.2009.03544.x [published Online First: 2009/12/17]
9. Van Braeckel KN, Taylor HG. Visuospatial and visuomotor deficits in preterm children: the involvement of cerebellar dysfunctioning. *Dev Med Child Neurol* 2013;55 Suppl 4:19-22. doi: 10.1111/dmcn.12301 [published Online First: 2013/11/28]
10. Setanen S, Lehtonen L, Parkkola R, et al. The motor profile of preterm infants at 11 y of age. *Pediatric research* 2016;80(3):389-94. doi: 10.1038/pr.2016.90 [published Online First: 2016/04/14]
11. Wong T, Taylor HG, Klein N, et al. Kindergarten classroom functioning of extremely preterm/extremely low birth weight children. *Early human development* 2014;90(12):907-14. doi: 10.1016/j.earlhumdev.2014.09.011 [published Online First: 2014/12/03]
12. Twilhaar ES, de Kieviet JF, Aarnoudse-Moens CS, et al. Academic performance of children born preterm: a meta-analysis and meta-regression. *Archives of disease in childhood Fetal and neonatal edition* 2017 doi: 10.1136/archdischild-2017-312916 [published Online First: 2017/08/30]
13. Johnson S, Hennessy E, Smith R, et al. Academic attainment and special educational needs in extremely preterm children at 11 years of age: the EPICure study. *Archives of disease in childhood Fetal and neonatal edition* 2009;94(4):F283-9. doi: 10.1136/adc.2008.152793 [published Online First: 2009/03/14]
14. Bonifacci P. Children with low motor ability have lower visual-motor integration ability but unaffected perceptual skills. *Human movement science* 2004;23(2):157-68. doi: 10.1016/j.humov.2004.08.002 [published Online First: 2004/10/12]

15. Goyen TA, Lui K, Woods R. Visual-motor, visual-perceptual, and fine motor outcomes in very-low-birthweight children at 5 years. *Dev Med Child Neurol* 1998;40(2):76-81. [published Online First: 1998/03/07]
16. Haartsen R, Jones EJH, Johnson MH. Human brain development over the early years. *Current Opinion in Behavioral Sciences* 2016;10:149-54. doi: 10.1016/j.cobeha.2016.05.015
17. Padilla N, Eklof E, Martensson GE, et al. Poor Brain Growth in Extremely Preterm Neonates Long Before the Onset of Autism Spectrum Disorder Symptoms. *Cerebral cortex (New York, NY : 1991)* 2015 doi: 10.1093/cercor/bhv300 [published Online First: 2015/12/23]
18. Monson BB, Anderson PJ, Matthews LG, et al. Examination of the Pattern of Growth of Cerebral Tissue Volumes From Hospital Discharge to Early Childhood in Very Preterm Infants. *JAMA pediatrics* 2016;170(8):772-9. doi: 10.1001/jamapediatrics.2016.0781 [published Online First: 2016/07/02]
19. Loh WY, Anderson PJ, Cheong JLY, et al. Neonatal basal ganglia and thalamic volumes: very preterm birth and 7-year neurodevelopmental outcomes. *Pediatric research* 2017 doi: 10.1038/pr.2017.161 [published Online First: 2017/07/13]
20. Keunen K, Isgum I, van Kooij BJ, et al. Brain Volumes at Term-Equivalent Age in Preterm Infants: Imaging Biomarkers for Neurodevelopmental Outcome through Early School Age. *J Pediatr* 2016;172:88-95. doi: 10.1016/j.jpeds.2015.12.023 [published Online First: 2016/01/18]
21. Serenius F, Ewald U, Farooqi A, et al. Neurodevelopmental Outcomes Among Extremely Preterm Infants 6.5 Years After Active Perinatal Care in Sweden. *JAMA pediatrics* 2016 doi: 10.1001/jamapediatrics.2016.1210 [published Online First: 2016/08/02]
22. Serenius F, Kallen K, Blennow M, et al. Neurodevelopmental outcome in extremely preterm infants at 2.5 years after active perinatal care in Sweden. *Jama* 2013;309(17):1810-20. doi: 10.1001/jama.2013.3786 [published Online First: 2013/05/02]
23. Inder TE, Wells SJ, Mogridge NB, et al. Defining the nature of the cerebral abnormalities in the premature infant: a qualitative magnetic resonance imaging study. *J Pediatr* 2003;143(2):171-9. doi: 10.1067/s0022-3476(03)00357-3 [published Online First: 2003/09/13]
24. Surveillance of cerebral palsy in Europe: a collaboration of cerebral palsy surveys and registers. Surveillance of Cerebral Palsy in Europe (SCPE). *Dev Med Child Neurol* 2000;42(12):816-24. [published Online First: 2000/12/29]
25. Jones JG, MacKinnon B, Good WV, et al. The early treatment for ROP (ETROP) randomized trial: study results and nursing care adaptations. *Insight (American Society of Ophthalmic Registered Nurses)* 2005;30(2):7-13. [published Online First: 2005/09/02]
26. Beery K.E BNA. The Beery-Buktenica developmental test of visual motor integration: Administration, scoring and teaching manual (5th ed.). Minneapolis: NCS Pearson Inc 2006.
27. Henderson SE SD, Barnett AL. Movement assessment battery for children-2 second edition [Movement ABC-2]. London, UK: The Psychological Corporation 2007.
28. Hyvarinen L, Nasanen R, Laurinen P. New visual acuity test for pre-school children. *Acta ophthalmologica* 1980;58(4):507-11. [published Online First: 1980/08/01]

- 1
- 2
- 3 29. Skiold B, Horsch S, Hallberg B, et al. White matter changes in extremely preterm
- 4 infants, a population-based diffusion tensor imaging study. *Acta paediatrica*
- 5 2010;99(6):842-9. doi: 10.1111/j.1651-2227.2009.01634.x
- 6 30. Shi F, Yap PT, Wu G, et al. Infant brain atlases from neonates to 1- and 2-year-
- 7 olds. *PLoS one* 2011;6(4):e18746. doi: 10.1371/journal.pone.0018746
- 8 [published Online First: 2011/05/03]
- 9 31. Young JM, Powell TL, Morgan BR, et al. Deep grey matter growth predicts
- 10 neurodevelopmental outcomes in very preterm children. *NeuroImage*
- 11 2015;111:360-8. doi: 10.1016/j.neuroimage.2015.02.030 [published Online
- 12 First: 2015/02/26]
- 13 32. Martinussen M, Flanders DW, Fischl B, et al. Segmental brain volumes and
- 14 cognitive and perceptual correlates in 15-year-old adolescents with low birth
- 15 weight. *J Pediatr* 2009;155(6):848-53.e1. doi: 10.1016/j.jpeds.2009.06.015
- 16 [published Online First: 2009/08/18]
- 17 33. Sripada K, Lohaugen GC, Eikenes L, et al. Visual-motor deficits relate to altered
- 18 gray and white matter in young adults born preterm with very low birth weight.
- 19 *NeuroImage* 2015;109:493-504. doi: 10.1016/j.neuroimage.2015.01.019
- 20 [published Online First: 2015/01/17]
- 21 34. Padilla N, Alexandrou G, Blennow M, et al. Brain Growth Gains and Losses in
- 22 Extremely Preterm Infants at Term. *Cerebral cortex (New York, NY : 1991)*
- 23 2015;25(7):1897-905. doi: 10.1093/cercor/bht431 [published Online First:
- 24 2014/02/04]
- 25 35. Kuklisova-Murgasova M, Aljabar P, Srinivasan L, et al. A dynamic 4D probabilistic
- 26 atlas of the developing brain. *NeuroImage* 2011;54(4):2750-63. doi:
- 27 10.1016/j.neuroimage.2010.10.019 [published Online First: 2010/10/26]
- 28 36. Ashburner J. A fast diffeomorphic image registration algorithm. *NeuroImage*
- 29 2007;38(1):95-113. doi: 10.1016/j.neuroimage.2007.07.007 [published Online
- 30 First: 2007/09/01]
- 31 37. Pernet C, Andersson J, Paulesu E, et al. When all hypotheses are right: a
- 32 multifocal account of dyslexia. *Human brain mapping* 2009;30(7):2278-92. doi:
- 33 10.1002/hbm.20670 [published Online First: 2009/02/25]
- 34 38. Skiold B, Alexandrou G, Padilla N, et al. Sex differences in outcome and
- 35 associations with neonatal brain morphology in extremely preterm children. *J*
- 36 *Pediatr* 2014;164(5):1012-8. doi: 10.1016/j.jpeds.2013.12.051 [published
- 37 Online First: 2014/02/18]
- 38 39. Keunen K, Kersbergen KJ, Groenendaal F, et al. Brain tissue volumes in preterm
- 39 infants: prematurity, perinatal risk factors and neurodevelopmental outcome: a
- 40 systematic review. *J Matern Fetal Neonatal Med* 2012;25 Suppl 1:89-100. doi:
- 41 10.3109/14767058.2012.664343 [published Online First: 2012/02/22]
- 42 40. Perneger TV. What's wrong with Bonferroni adjustments. *BMJ (Clinical research*
- 43 *ed)* 1998;316(7139):1236-8. [published Online First: 1998/05/16]
- 44 41. Rothman KJ. No adjustments are needed for multiple comparisons. *Epidemiology*
- 45 *(Cambridge, Mass)* 1990;1(1):43-6. [published Online First: 1990/01/01]
- 46 42. Nakagawa S. A farewell to Bonferroni: the problems of low statistical power and
- 47 publication bias. *Behavioral Ecology* 2004;15(6):1044-45. doi:
- 48 10.1093/beheco/arh107
- 49 43. de Kieviet JF, Piek JP, Aarnoudse-Moens CS, et al. Motor development in very
- 50 preterm and very low-birth-weight children from birth to adolescence: a meta-
- 51 analysis. *Jama* 2009;302(20):2235-42. doi: 10.1001/jama.2009.1708
- 52 [published Online First: 2009/11/26]
- 53
- 54
- 55
- 56
- 57
- 58
- 59
- 60

- 1  
2  
3 44. Kesler SR, Reiss AL, Vohr B, et al. Brain volume reductions within multiple  
4 cognitive systems in male preterm children at age twelve. *J Pediatr*  
5 2008;152(4):513-20, 20.e1. doi: 10.1016/j.jpeds.2007.08.009 [published  
6 Online First: 2008/03/19]
- 7 45. Constable RT, Ment LR, Vohr BR, et al. Prematurely born children demonstrate  
8 white matter microstructural differences at 12 years of age, relative to term  
9 control subjects: an investigation of group and gender effects. *Pediatrics*  
10 2008;121(2):306-16. doi: 10.1542/peds.2007-0414 [published Online First:  
11 2008/02/05]
- 12 46. Thomas AR, Lacadie C, Vohr B, et al. Fine Motor Skill Mediates Visual Memory  
13 Ability with Microstructural Neuro-correlates in Cerebellar Peduncles in  
14 Prematurely Born Adolescents. *Cerebral cortex (New York, NY : 1991)* 2017  
15 doi: 10.1093/cercor/bhw415 [published Online First: 2017/01/22]
- 16 47. Braddick O, Atkinson J. Development of human visual function. *Vision research*  
17 2011;51(13):1588-609. doi: 10.1016/j.visres.2011.02.018 [published Online  
18 First: 2011/03/02]
- 19 48. Sepulcre J. Integration of visual and motor functional streams in the human brain.  
20 *Neuroscience letters* 2014;567:68-73. doi: 10.1016/j.neulet.2014.03.050  
21 [published Online First: 2014/04/05]
- 22 49. Peterson BS, Vohr B, Staib LH, et al. Regional brain volume abnormalities and  
23 long-term cognitive outcome in preterm infants. *Jama* 2000;284(15):1939-47.  
24 [published Online First: 2000/10/18]
- 25 50. Holmstrom L, de Manzano O, Vollmer B, et al. Dissociation of brain areas  
26 associated with force production and stabilization during manipulation of  
27 unstable objects. *Experimental brain research* 2011;215(3-4):359-67. doi:  
28 10.1007/s00221-011-2903-9 [published Online First: 2011/11/01]
- 29 51. Noroozian M. The role of the cerebellum in cognition: beyond coordination in the  
30 central nervous system. *Neurologic clinics* 2014;32(4):1081-104. doi:  
31 10.1016/j.ncl.2014.07.005 [published Online First: 2014/12/03]
- 32 52. Ranger M, Zwicker JG, Chau CM, et al. Neonatal Pain and Infection Relate to  
33 Smaller Cerebellum in Very Preterm Children at School Age. *J Pediatr*  
34 2015;167(2):292-8.e1. doi: 10.1016/j.jpeds.2015.04.055 [published Online  
35 First: 2015/05/20]
- 36 53. Ohl AM, Graze H, Weber K, et al. Effectiveness of a 10-week tier-1 response to  
37 intervention program in improving fine motor and visual-motor skills in general  
38 education kindergarten students. *The American journal of occupational*  
39 *therapy : official publication of the American Occupational Therapy Association*  
40 2013;67(5):507-14. doi: 10.5014/ajot.2013.008110 [published Online First:  
41 2013/08/24]
- 42 54. Van Hus JW, Jeukens-Visser M, Koldewijn K, et al. Sustained developmental  
43 effects of the infant behavioral assessment and intervention program in very  
44 low birth weight infants at 5.5 years corrected age. *J Pediatr*  
45 2013;162(6):1112-9. doi: 10.1016/j.jpeds.2012.11.078 [published Online First:  
46 2013/01/15]
- 47  
48  
49  
50  
51  
52  
53  
54  
55  
56  
57  
58  
59  
60

1  
2  
3  
4  
5  
6  
7  
8  
9  
10  
11  
12  
13  
14  
15  
16  
17  
18  
19  
20  
21  
22  
23  
24  
25  
26  
27  
28  
29  
30  
31  
32  
33  
34  
35  
36  
37  
38  
39  
40  
41  
42  
43  
44  
45  
46  
47  
48  
49  
50  
51  
52  
53  
54  
55  
56  
57  
58  
59  
60

For peer review only

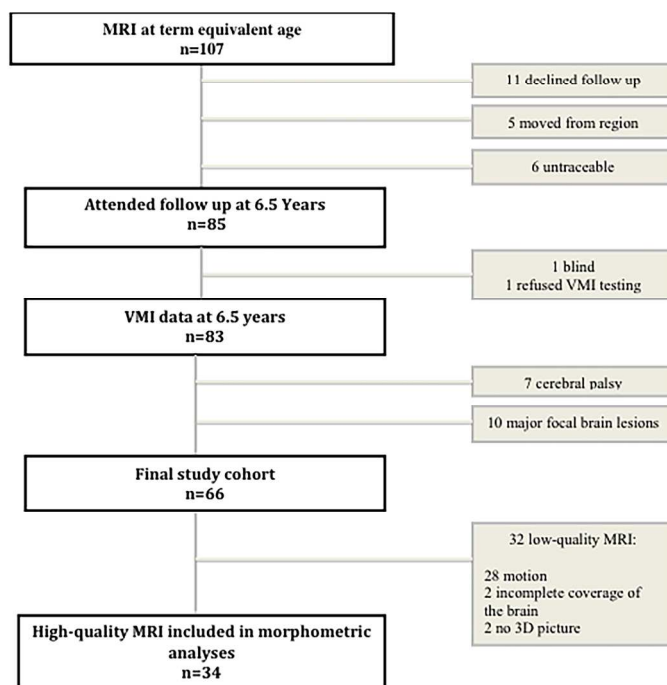

Figure 1. Study population

96x72mm (600 x 600 DPI)



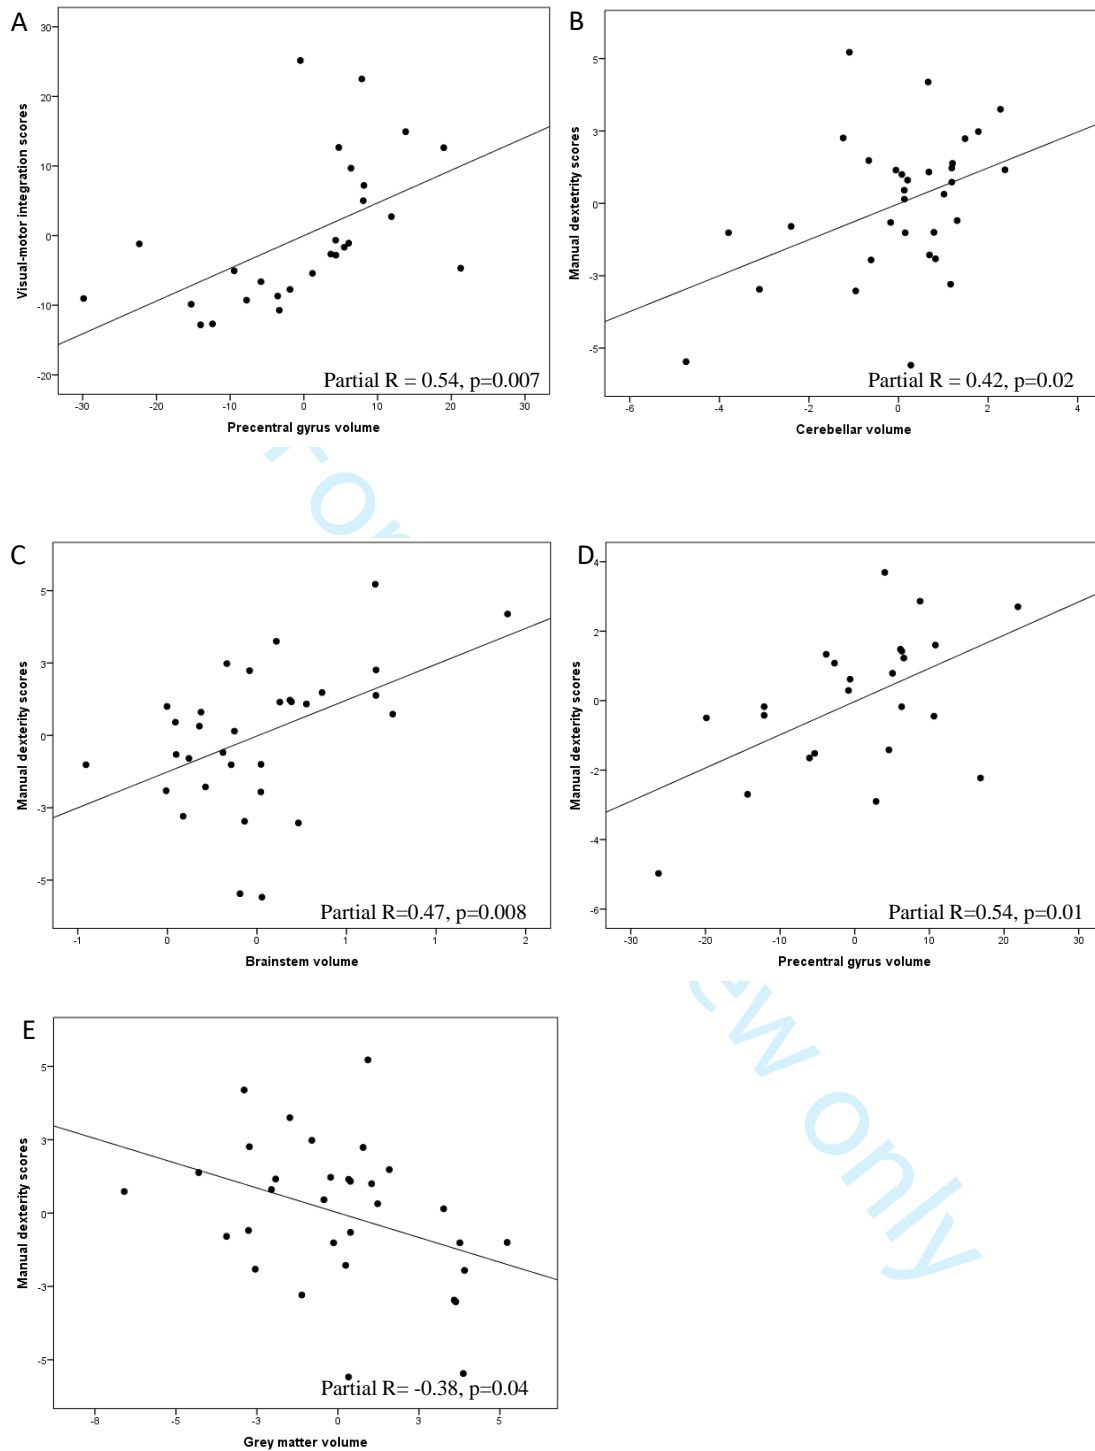

**Figure 2.** Illustrations of partial correlations between neonatal brain volumes, visual-motor integration and fine motor skills (assessed by manual dexterity scores on the Movement Assessment Battery for Children-2) at 6.5 years of age, using plots of residuals. Analyses are adjusted for total cerebral parenchyma (grey matter plus white matter) and sex. (A) Correlations between the volume of the precentral gyrus and visual-motor integration scores. (B-E) Correlations between the volumes of the cerebellum, brainstem, precentral gyrus, grey matter and fine motor skills.

**Table 1.** Characteristics of the 66 children born at gestational age below 27 weeks and without major brain lesions or cerebral palsy (n = 66)

|                                                       |                  |
|-------------------------------------------------------|------------------|
| Gestational age at birth, weeks, median (range)       | 25.6 (23.4-26.6) |
| Birth weight, grams, mean (SD)                        | 839 (152)        |
| Gender, girls/boys                                    | 29/37            |
| Small for gestational age, n (%)                      | 4 (6)            |
| Prenatal steroids, n (%)                              | 60 (91)          |
| Premature Rupture of the Membranes, n (%)             | 19 (29)          |
| Cesarean section, n (%)                               | 32 (48)          |
| Sepsis, n (%)                                         | 51 (77)          |
| Days of mechanical ventilation, median (range)        | 7 (0-55)         |
| Postnatal steroids, n (%)                             | 11 (17)          |
| Bronchopulmonary dysplasia, oxygen at 36 weeks, n (%) | 26 (39)          |
| Necrotizing Enterocolitis, n (%)                      | 6 (9)            |
| Patent Ductus Arteriosus, ligation, n (%)             | 20 (30)          |
| Laser treatment for Retinopathy of Prematurity, n (%) | 8 (12)           |
| Intraventricular hemorrhage grade I-II, n (%)         | 23 (35)          |

SD = Standard Deviation, n = number. Sepsis was defined as positive blood culture or clinical picture of sepsis in association with elevated C-reactive protein or leukocyte count. Data on small for gestational age was missing for four children.

**Supplementary Table 1.** Characteristics of the children born at gestational age <27 weeks with or without high quality MRI

|                                                    | <b>High quality MRI</b><br><b>n=34</b> | <b>Low quality MRI</b><br><b>n=32</b> | <b><i>p</i></b> |
|----------------------------------------------------|----------------------------------------|---------------------------------------|-----------------|
| Gestational age at birth, weeks, median (range)    | 25.85 (23.4-26.6)                      | 25.45 (23.4-26.6)                     | 0.16            |
| Birth weight, grams, mean (SD)                     | 857 (154)                              | 820 (47)                              | 0.33            |
| Gender, girls/boys, n                              | 15/19                                  | 14/18                                 | 1.00            |
| Small for gestational age, n                       | 1                                      | 3                                     | 0.35            |
| Prenatal steroids, n                               | 32                                     | 28                                    | 0.42            |
| Premature rupture of the membranes, n              | 10                                     | 9                                     | 1.00            |
| Cesarean section, n                                | 16                                     | 16                                    | 1.00            |
| Sepsis, n                                          | 24                                     | 27                                    | 0.24            |
| Days of mechanical ventilation, median (range)     | 3 (0-37)                               | 11 (0-55)                             | <b>0.04</b>     |
| Postnatal steroids, n                              | 4                                      | 7                                     | 0.33            |
| Bronchopulmonary Dysplasia, oxygen at 36 weeks, n  | 12                                     | 14                                    | 0.62            |
| Necrotizing enterocolitis, n                       | 1                                      | 5                                     | 0.10            |
| Patent ductus arteriosus, ligation, n              | 9                                      | 11                                    | 0.60            |
| Laser treatment for retinopathy of prematurity, n  | 2                                      | 6                                     | 0.14            |
| Intraventricular hemorrhage grade I-II, n          | 10                                     | 13                                    | 0.44            |
| Mild white matter abnormality, n                   | 18                                     | 12                                    | 0.09            |
| Gestational age at MRI, weeks, median (range)      | 40.79 (39.14-45.28)                    | 40.28 (39.14-43.28)                   | 0.08            |
| Age at 6.5 year assessment, months, median (range) | 77.20 (75.29-80.18)                    | 77.23 (76.03-86.33)                   | 0.59            |
| VMI standard score, mean (SD)                      | 94 (10)                                | 91 (9)                                | 0.20            |
| M-ABC-2 manual dexterity score, mean (SD)          | 8 (2)                                  | 7 (3)                                 | 0.68            |

1  
2  
3 All children were without cerebral palsy, focal brain lesions or severe white matter  
4  
5 abnormalities. SD = Standard deviation, MRI = Magnetic Resonance Imaging, VMI=Visual-  
6  
7 motor integration, M-ABC-2=Movement Assessment Battery for Children-2  
8  
9  
10  
11  
12  
13  
14  
15  
16  
17  
18  
19  
20  
21  
22  
23  
24  
25  
26  
27  
28  
29  
30  
31  
32  
33  
34  
35  
36  
37  
38  
39  
40  
41  
42  
43  
44  
45  
46  
47  
48  
49  
50  
51  
52  
53  
54  
55  
56  
57  
58  
59  
60

For peer review only

**Supplementary Table 2.** Characteristics of the children born at gestational age <27 weeks with and without atlas segmentation data.

|                                                    | <b>Atlas<br/>segmentation data<br/>n=26</b> | <b>No atlas<br/>segmentation data<br/>n=40</b> | <i>p</i> |
|----------------------------------------------------|---------------------------------------------|------------------------------------------------|----------|
| Gestational age at birth, weeks, median (range)    | 26.85 (23.4-26.6)                           | 25.50 (23.4-26.6)                              | 0.28     |
| Birth weight, grams, mean (SD)                     | 874 (153)                                   | 817 (146)                                      | 0.13     |
| Gender, girls/boys                                 | 13/13                                       | 16                                             | 0.46     |
| Small for gestational age, n                       | 0                                           | 4                                              | 0.15     |
| Prenatal steroids, n                               | 25/26                                       | 35                                             | 0.39     |
| Premature rupture of the membranes, n              | 7                                           | 12                                             | 1.00     |
| Cesarean Section, n                                | 10                                          | 22                                             | 0.22     |
| Sepsis, n                                          | 17                                          | 34                                             | 0.08     |
| Days of mechanical ventilation, median (range)     | 3 (0-36)                                    | 10 (0-55)                                      | 0.04     |
| Postnatal steroids, n                              | 3                                           | 8                                              | 0.51     |
| Bronchopulmonary Dysplasia, oxygen at 36 weeks, n  | 10                                          | 16                                             | 1.00     |
| Necrotizing enterocolitis, n                       | 0                                           | 6                                              | 0.07     |
| Patent ductus arteriosus, ligation, n              | 7                                           | 13                                             | 0.79     |
| Laser treatment for retinopathy of prematurity, n  | 1                                           | 7                                              | 0.13     |
| Intraventricular hemorrhage grade I-II, n          | 7                                           | 16                                             | 0.30     |
| Mild white matter abnormality, n                   | 16                                          | 14                                             | 0.09     |
| Gestational age at MRI, weeks, median (range)      | 40.93 (39.71-43.28)                         | 40.36 (39.14-45.28)                            | 0.18     |
| Age at 6.5 year assessment, months, median (range) | 77.16 (75.29-80.20)                         | 77.23 (76.03-86.33)                            | 0.21     |
| VMI standard score, mean (SD)                      | 91.69 (14.14)                               | 89.82 (11.71)                                  | 0.87     |

|                                           |       |       |      |
|-------------------------------------------|-------|-------|------|
| M-ABC-2 manual dexterity score, mean (SD) | 7 (2) | 8 (3) | 0.38 |
|-------------------------------------------|-------|-------|------|

All children were without cerebral palsy, focal brain lesions or severe white matter abnormalities.

SD = Standard deviation, MRI = Magnetic Resonance Imaging, VMI=Visual-motor integration, M-ABC-2=Movement Assessment Battery for Children-2

For peer review only

**Supplementary Table 3.** Correlations between brain volumes at term equivalent age, visual-motor integration and fine motor skills scores a 6.5 years in children born at GA <27 weeks.

| Brain region                   | Visual-motor integration            |              | Fine motor skills                   |              |
|--------------------------------|-------------------------------------|--------------|-------------------------------------|--------------|
|                                | Correlation coefficient (partial r) | p            | Correlation coefficient (partial r) | p            |
| Grey matter                    | 0.05                                | 0.77         | -0.38                               | <b>0.04</b>  |
| White matter                   | -0.33                               | 0.07         | 0.11                                | 0.57         |
| Deep grey matter               | 0.02                                | 0.93         | 0.05                                | 0.79         |
| Cerebellum                     | 0.24                                | 0.19         | 0.42                                | <b>0.02</b>  |
| Brain stem                     | 0.08                                | 0.66         | 0.47                                | <b>0.008</b> |
| Frontal lobe                   | -0.11                               | 0.61         | -0.19                               | 0.40         |
| Temporal lobe                  | -0.10                               | 0.63         | -0.12                               | 0.61         |
| Parietal lobe                  | -0.33                               | 0.12         | -0.22                               | 0.32         |
| Occipital lobe                 | 0.18                                | 0.40         | 0.26                                | 0.24         |
| Central Region                 | 0.35                                | 0.09         | 0.30                                | 0.17         |
| <b>Networks</b>                |                                     |              |                                     |              |
| <b>Visual network</b>          |                                     |              |                                     |              |
| Superior occipital gyrus       | 0.23                                | 0.28         | 0.39                                | 0.07         |
| Middle occipital gyrus         | 0.12                                | 0.59         | 0.06                                | 0.78         |
| Inferior occipital gyrus       | -0.26                               | 0.22         | -0.21                               | 0.35         |
| Calcarine cortex               | -0.24                               | 0.27         | -0.01                               | 0.97         |
| Cuneus                         | 0.27                                | 0.20         | 0.20                                | 0.37         |
| Lingual gyrus                  | -0.13                               | 0.54         | -0.01                               | 0.67         |
| <b>Motor network</b>           |                                     |              |                                     |              |
| Precentral gyrus               | 0.54                                | <b>0.007</b> | 0.54                                | <b>0.01</b>  |
| Frontal medial                 | 0.005                               | 0.99         | -0.05                               | 0.83         |
| Supplementary motor area       | -0.03                               | 0.89         | -0.19                               | 0.40         |
| <b>Sensory network</b>         |                                     |              |                                     |              |
| Postcentral gyrus              | 0.07                                | 0.75         | 0.17                                | 0.45         |
| <b>Salience network</b>        |                                     |              |                                     |              |
| Insula                         | -0.001                              | 0.99         | -0.08                               | 0.73         |
| Anterior cingulate gyrus       | 0.09                                | 0.67         | 0.10                                | 0.65         |
| Thalamus                       | -0.04                               | 0.87         | 0.11                                | 0.62         |
| Amygdala                       | -0.16                               | 0.45         | -0.23                               | 0.31         |
| <b>Default mode network</b>    |                                     |              |                                     |              |
| Precuneus                      | -0.26                               | 0.22         | -0.05                               | 0.84         |
| Angular gyrus                  | 0.26                                | 0.21         | -0.17                               | 0.45         |
| Hippocampus                    | -0.08                               | 0.72         | -0.11                               | 0.63         |
| <b>Subcortical regions</b>     |                                     |              |                                     |              |
| Subcortical grey matter, total | -0.10                               | 0.63         | -0.04                               | 0.86         |
| Pallidum                       | 0.01                                | 0.99         | 0.07                                | 0.76         |

|         |       |      |       |      |
|---------|-------|------|-------|------|
| Caudate | -0.04 | 0.85 | -0.09 | 0.70 |
| Putamen | -0.26 | 0.23 | 0.06  | 0.79 |

All children are without cerebral palsy or major brain lesions. Results from Pearson's partial correlation, adjusted for total cerebral parenchyma (total cortical grey and white matter) and sex. Central region = precentral and postcentral gyri, rolandic operculum bilaterally.

For peer review only



# BMJ Open

## Visual-motor integration and fine motor skills at 6.5 years of age and associations with neonatal brain volumes in children born extremely preterm in Sweden: population-based cohort study

|                                 |                                                                                                                                                                                                                                                                                                                                                                                                                                                                                                                                                                                                                      |
|---------------------------------|----------------------------------------------------------------------------------------------------------------------------------------------------------------------------------------------------------------------------------------------------------------------------------------------------------------------------------------------------------------------------------------------------------------------------------------------------------------------------------------------------------------------------------------------------------------------------------------------------------------------|
| Journal:                        | <i>BMJ Open</i>                                                                                                                                                                                                                                                                                                                                                                                                                                                                                                                                                                                                      |
| Manuscript ID                   | bmjopen-2017-020478.R1                                                                                                                                                                                                                                                                                                                                                                                                                                                                                                                                                                                               |
| Article Type:                   | Research                                                                                                                                                                                                                                                                                                                                                                                                                                                                                                                                                                                                             |
| Date Submitted by the Author:   | 21-Dec-2017                                                                                                                                                                                                                                                                                                                                                                                                                                                                                                                                                                                                          |
| Complete List of Authors:       | Bolk, Jenny; Department of Women 's and Children 's Health, Karolinska Institutet; Sachs 's Children and Youth Hospital, Sachsska barnsjukhuset, Stockholms läns landsting<br>Padilla, Nelly; Karolinska Institutet, Department of Women 's and Children 's Health<br>Forsman, Lea; Karolinska Institutet, Department of Women 's and Children 's Health<br>Brostrom, L; Karolinska Institutet, Department of Women 's and Children 's Health<br>Hellgren, Kerstin; Karolinska institutet, Department of Clinical Neuroscience<br>Åden, Ulrika; Karolinska institutet, Department of Women 's and Children 's Health |
| <b>Primary Subject Heading</b>: | Paediatrics                                                                                                                                                                                                                                                                                                                                                                                                                                                                                                                                                                                                          |
| Secondary Subject Heading:      | Neurology                                                                                                                                                                                                                                                                                                                                                                                                                                                                                                                                                                                                            |
| Keywords:                       | outcome, extremely preterm born child, brain development, school-age, visual-motor integration, fine motor skills                                                                                                                                                                                                                                                                                                                                                                                                                                                                                                    |
|                                 |                                                                                                                                                                                                                                                                                                                                                                                                                                                                                                                                                                                                                      |

SCHOLARONE™  
Manuscripts

1  
2  
3 **Visual-motor integration and fine motor skills at 6.5 years of age and**  
4 **associations with neonatal brain volumes in children born extremely preterm in**  
5 **Sweden: population-based cohort study**  
6  
7  
8  
9

10 Jenny Bolk, M.D.<sup>1,2</sup>, Nelly Padilla M.D, PhD<sup>1</sup>, Lea Forsman, PhD<sup>1</sup>, Lina Broström,  
11 M.D.<sup>1</sup>, Kerstin Hellgren, M.D., PhD<sup>3,4</sup>, Ulrika Åden M.D, PhD<sup>1,5</sup>  
12  
13

14 **Corresponding author:** Jenny Bolk, Sachs' Children and Youth Hospital,  
15 Södersjukhuset, SE-118 83 Stockholm, Sweden. Email: jenny.bolk@ki.se Telephone  
16 number: +46-7-4356585. Fax number: Fax: +46851777353  
17  
18  
19  
20  
21  
22

23 <sup>1</sup>Department of Women's and Children's Health, Karolinska Institutet, <sup>2</sup>Sachs'  
24 Children and Youth Hospital, <sup>3</sup>Department of Clinical Neuroscience, Karolinska  
25 Institutet, <sup>4</sup>Neuropediatric Department, Astrid Lindgren Children's Hospital,  
26 Karolinska University Hospital, <sup>5</sup>Neonatal Unit, Astrid Lindgren Children's Hospital,  
27 Karolinska University Hospital, Stockholm, Sweden  
28  
29  
30  
31  
32  
33  
34  
35  
36

37 **Key words:** Brain development, Extremely Preterm, Outcome, School-age  
38  
39  
40  
41

42 **Word count:** 3780 words  
43  
44  
45  
46  
47

#### 48 **Abstract**

##### 49 *Objectives*

50  
51  
52 This exploratory study aimed to investigate associations between neonatal brain  
53 volumes and visual-motor integration (VMI) and fine motor skills in children born EPT  
54 when they reached 6.5 years of age.  
55  
56  
57  
58  
59  
60

### *Setting*

Prospective population-based cohort study in Stockholm, Sweden, during three years.

### *Participants*

All children born before gestational age 27 weeks 2004-2007 in Stockholm, without major morbidities and impairments, and who underwent magnetic resonance imaging at term-equivalent age.

### *Main outcome measures*

Brain volumes were calculated using morphometric analyses in regions known to be involved in VMI and fine motor functions. VMI was assessed with The Beery-Buktenica Developmental Test of Visual-Motor Integration - Sixth Edition and fine motor skills were assessed with the manual dexterity subtest from the Movement Assessment Battery for Children-Second Edition, at 6.5 years. Associations between the brain volumes and VMI and fine motor skills were evaluated using partial correlation, adjusted for total cerebral parenchyma and sex.

### *Results*

Out of 107 children born at gestational age <27 weeks, 83 were assessed at 6.5 years and 66/83 were without major brain lesions or cerebral palsy and included in the analyses. A representative subsample underwent morphometric analyses: automatic segmentation (n=34) and atlas-based segmentation (n=26). The precentral gyrus was associated with both VMI ( $r=0.54$ ,  $p=0.007$ ) and fine motor skills ( $r=0.54$ ,  $p=0.01$ ). Associations were also seen between fine motor skills and the volume of the cerebellum ( $r=0.42$ ,  $p=0.02$ ), brainstem ( $r=0.47$ ,  $p=0.008$ ) and grey matter ( $r=-0.38$ ,  $p=0.04$ ).

### *Conclusions*

1  
2  
3 Neonatal brain volumes in areas known to be involved in VMI and fine motor skills  
4  
5 were associated with scores for these two functions when children born EPT without  
6  
7 major brain lesions or cerebral palsy were evaluated at 6.5 years of age. Establishing  
8  
9 clear associations between early brain volume alterations and later VMI and/or fine  
10  
11 motor skills could make early interventions possible.  
12  
13

### 14 **Strengths and limitations of this study**

- 17 • This was a robust population-based cohort study design that used advanced  
18 magnetic resonance imaging techniques and established assessment tools  
19  
20
- 21 • It studied visual-motor integration and fine motor skills in extremely preterm  
22 born children at 6.5 years, which is an important age for Swedish school  
23 children  
24  
25
- 26 • Although we had to exclude numerous children from the morphometric  
27 analyses, due to strict data quality criteria, the sample was representative of  
28 the cohort  
29  
30
- 31 • We were unable to include a control group of children born at term in the  
32 analyses  
33  
34  
35  
36  
37  
38  
39  
40  
41

### 42 **Funding**

43  
44 This work was supported by the Swedish Medical Research Council (grant numbers  
45 523-2011-3981), the regional agreement on medical training and clinical between  
46 Stockholm County Council and the Karolinska Institutet (grant number ALF-  
47 20140316, 20100646 and 20150876), the Marianne and Marcus Wallenberg  
48 foundation (grant number 2011.0085), the Swedish Order of Freemasons in  
49 Stockholm, the Swedish Medical Society, the Swedish Brain Foundation (grant  
50  
51  
52  
53  
54  
55  
56  
57  
58  
59  
60

1  
2  
3 number FP2017-0131), Linnéa and Josef Carlssons Stiftelse, Sachs' Children and  
4 Youth Hospital, Stiftelsen Samariten, H.K.H. Kronprinsessan Lovisas Förening för  
5 barnsjukvård, Sällskapet Barnavård, the Sigvard & Marianne Bernadotte Research  
6 Foundation for Children Eye Care and the Märta and Gunnar Philipson foundation. U  
7  
8  
9  
10  
11 Ådén was supported by Stockholm County Council (clinical research appointment).  
12  
13 The study sponsors had no role in the study design, collection, analysis or  
14  
15 interpretation of data, writing the report or the decision to submit the article for  
16  
17 publication.  
18  
19

20  
21 **Competing interests:** None  
22  
23  
24  
25  
26  
27  
28  
29  
30  
31  
32  
33  
34  
35  
36  
37  
38  
39  
40  
41  
42  
43  
44  
45  
46

## 47 **Introduction**

48  
49  
50 Visual-motor function is an important cross-modal ability that involves the integration  
51  
52 of visual function and perception, eye-hand coordination, fine motor skills and visual-  
53  
54 motor integration (VMI) <sup>1</sup>. Studies have shown that VMI can predict a child's future  
55  
56  
57  
58  
59  
60

1  
2  
3 hand-writing skills<sup>2-4</sup> and academic performance in reading, writing and mathematics  
4  
5<sup>5</sup>. Evaluating VMI performance is therefore an important component of the test  
6  
7 batteries that are used to detect children who risk school problems. Fine motor skills  
8  
9 are a fundamental component of hand and visual-motor function, which also  
10  
11 contributes to school performance<sup>6</sup>. Several reports have shown that children born  
12  
13 preterm have poor VMI and motor function<sup>7 8-10</sup> and it is well known that this group of  
14  
15 children risk poor school performance and learning disabilities<sup>11-13</sup>.

16  
17  
18 Although problems with VMI can stem from any of the underlying, contributing  
19  
20 abilities listed above, when VMI and motor abilities have been investigated together,  
21  
22 and perceptual and general cognitive abilities have been held constant, children with  
23  
24 lower general motor scores are seen to have lower VMI scores<sup>14</sup>. Children born very  
25  
26 low birth weight show a similar pattern<sup>15</sup>: VMI showing stronger relationships with  
27  
28 motor ability than with visual perception, suggesting that motor skills and manual fine  
29  
30 motor skills in particular, are crucial components underlying VMI. On the other hand,  
31  
32 visual perceptual deficits in children born EPT are well documented<sup>7</sup> and their role in  
33  
34 VMI should not be underestimated even though their contribution to VMI in children  
35  
36 born EPT was not investigated in the present study. Therefore, a less-defined  
37  
38 exploration of brain areas known to be associated with VMI is a useful approach,  
39  
40 especially when investigating the neural associations of a multi-modal ability, in  
41  
42 groups with potentially atypical brain development trajectories<sup>16</sup>.

43  
44  
45  
46  
47 It is largely unknown how the developmental alterations of the brain affect VMI and  
48  
49 fine motor skills in children born preterm. However, we have previously reported that  
50  
51 neonatal brain volumes are affected in preterm infants<sup>17</sup>, and other researchers have  
52  
53 shown that these alterations in preterm brain volumes persist until at least early  
54  
55 childhood<sup>18</sup>. Volumetric alterations in the brain have also been associated with  
56  
57

1  
2  
3 neurodevelopmental outcomes in preterm born children<sup>19 20</sup>. However, the  
4  
5 relationship between volume alterations in the brains of children born extremely  
6  
7 (EPT), at less than 27 weeks of gestation, and VMI and fine motor skills at school  
8  
9 age remains largely unexplored.

10  
11 It has been reported that several networks in the brain are involved in the mediation  
12  
13 of VMI and fine motor skills - the visual, salience, sensory motor and default mode  
14  
15 networks<sup>21</sup>. Previous studies in adolescents born preterm have indicated that  
16  
17 volumes of the cerebellum and thalamus<sup>22</sup>, superior temporal gyrus, insula, medial  
18  
19 occipital lobe and temporal lobe<sup>23</sup> are associated to VMI scores. Also, a study  
20  
21 looking at brain growth in preterm children reported that growth of the caudate and  
22  
23 globus pallidus could predict VMI scores<sup>24</sup>. Based on these previous reports, we  
24  
25 hypothesized that early brain volume alterations in these regions and networks in the  
26  
27 brain would be related to later VMI and fine motor skills in Children born extremely  
28  
29 preterm. We used an exploratory approach to investigate these possible associations,  
30  
31 using two separate analyses to measure the brain volumes at term-equivalent age :  
32  
33 atlas-based segmentation and automatic segmentation, and carried out a clinical  
34  
35 evaluation of VMI and fine motor skills at the age of 6.5 years.  
36  
37  
38  
39  
40  
41  
42

## 43 **Methods**

### 44 ***Study population***

45  
46 The study population was a sub-cohort of the Extremely Preterm Infants in Sweden  
47  
48 Study (EXPRESS) cohort. EXPRESS was a prospective national population-based  
49  
50 cohort study which invited all children born in Sweden at a gestational age (GA) of  
51  
52 less than 27 weeks over a three-year period to take part in clinical follow ups at 2.5  
53  
54 and 6.5 years of age<sup>25 26</sup>. The present study included 107 children born in Stockholm  
55  
56  
57  
58  
59  
60

1  
2  
3 between January 1 2004 and March 31 2007, without chromosomal aberrations,  
4 congenital malformations or infections, who had undergone magnetic resonance  
5 imaging (MRI) of the brain at term equivalent age.  
6  
7

8  
9 Gestational age was assessed by maternal ultrasound at around a GA of 18 weeks  
10 and perinatal and neonatal data were prospectively collected from the children's  
11 medical records. Cranial ultrasound was performed on a regular basis during the  
12 neonatal period up to a GA of 40 weeks, according to our clinical routine. Children  
13 were excluded from the analyses in the present study if they had major brain lesions  
14 defined as intraventricular hemorrhage, periventricular leukomalacia, severe white  
15 matter score according to Inder <sup>27</sup> or hydrocephalus, or cerebral palsy (CP) as  
16 defined by the Surveillance of Cerebral Palsy in Europe Working Group <sup>28</sup>. All  
17 children had been screened for retinopathy of prematurity and evidence-based  
18 treatment had been administered <sup>29</sup>.  
19  
20  
21  
22  
23  
24  
25  
26  
27  
28  
29

30  
31 The study was approved by the local ethics committees in Stockholm and Lund  
32 (Regionala etikprövningsnämnden in Stockholm, dnr 04-889/2, 2006/1217-32 and  
33 2010/850-31/1; Regionala etikprövningsnämnden in Lund, dnr 42/2004, dnr 2009/9  
34 and dnr 2016/104) and the parents of all the children gave their written, informed  
35 consent before the study.  
36  
37  
38  
39  
40

### 41 42 **Assessment at 6.5 years of age**

43

44  
45 Visual-motor integration was assessed using the Beery-Buktenica Developmental  
46 Test of Visual-Motor Integration - sixth edition <sup>30</sup>. This test consists of 30 geometrical  
47 shapes that the child is asked to copy with a pen and paper and it is terminated when  
48 three figures in a row have been incorrectly copied. The drawings are examined and  
49 acceptable approximations of the model drawings are each given one point. The raw  
50 score is the total number of correct drawings and this is then transformed to an age-  
51  
52  
53  
54  
55  
56  
57  
58  
59  
60



1  
2  
3 corrected standard score. Standard scores were used in the analyses in this study.

4  
5 The normative mean score is 100 with a standard deviation (SD) of 15.

6  
7 Fine motor skills were assessed with the manual dexterity subtest of the Movement  
8  
9 Assessment Battery for Children – Second edition (M-ABC-2) which measures  
10  
11 unimanual speed, bimanual coordination and unimanual spatial accuracy<sup>31</sup>. Age-  
12  
13 adjusted standard scores were used for the analyses. The reference mean score is  
14  
15 10 with a standard deviation of 3, and scores below 7 indicate definitive or borderline  
16  
17 motor problems.

18  
19 Binocular visual acuity was measured with habitual correction at three meters with  
20  
21 the Lea Hyvärinen chart<sup>32</sup>. Visual impairment was defined as a visual acuity of less  
22  
23 than 0.33 in the better eye.  
24  
25

### 26 27 ***MRI data acquisition and processing***

28  
29 All the children were scanned using a Philips Intera 1.5 Tesla MRI system (Philips  
30  
31 International, Amsterdam, The Netherlands) at term equivalent age.. The child was  
32  
33 fed before the scanning procedure and given a low dose of chloralhydrate (30 mg/kg)  
34  
35 orally or rectally, as previously described<sup>33</sup>. A sagittal T1-weighted turbo spin echo  
36  
37 sequence, an axial inversion recovery sequence and an axial T2-weighted sequence  
38  
39 were run. The three-dimensional T1-weighted images were acquired with an echo  
40  
41 time of 4.6 msec, a repetition time of 40 msec, a flip angle of 30°, a voxel size of 0.7  
42  
43 × 0.7 × 0.1 mm and a field of view of 180mm. The MRI protocol has previously been  
44  
45 reported<sup>33</sup>. Quality assurance was considered important in order to obtain accurate  
46  
47 data, even though this meant that we were left with a relatively small sample size.  
48  
49 The imaging data was checked for quality, based on a visual inspection of the raw  
50  
51 data sets, and the reasons for low imaging quality are presented in **Figure 1**. MRI  
52  
53 data went into two separate analyses, atlas based segmentation and automatic  
54  
55  
56  
57  
58  
59  
60

1  
2  
3 segmentation; atlas-based segmentation to conduct the regional segmentation of  
4 specific regions <sup>34</sup> and automatic segmentation to extract the mean volumes of the  
5 grey matter white matter, cerebrospinal fluid, basal ganglia, brainstem and  
6 cerebellum <sup>35</sup>.  
7  
8  
9  
10

### 11 ***Atlas based segmentation***

12  
13  
14 The whole brain of the included infants was divided into 90 anatomical regions, by  
15 using the automated anatomical labelling neonatal atlas <sup>34</sup>, as previously described  
16 <sup>36</sup>. Briefly, the intensity image that generated the neonatal atlas was registered to the  
17 T1-weighted image of each infant, then the generated deformation field was used to  
18 transform the label map with 90 regions from the atlas space to the subject space  
19 (Supplementary Figure 1). A visual inspection was performed for each subject and  
20 each step. The volume of each region was determined by using a proper script  
21 written in MATLAB selecting the region of interest via its voxel value.  
22  
23  
24  
25  
26  
27  
28  
29  
30

31 We selected brain regions that had been previously described as being in the  
32 networks that mediate VMI and fine motor skills, namely the visual, salience, sensory  
33 motor and default mode networks <sup>22-24</sup>. We also considered the subcortical regions:  
34 pallidum, putamen, caudate and thalamus. The volume of each brain region was  
35 determined by adding together the volumes of their components.  
36  
37  
38  
39  
40  
41  
42

### 43 ***Automatic segmentation***

44  
45 We first performed automatic segmentation of brain tissues (T1-weighted images)  
46 using SPM8 software (<http://www.fil.ion.ucl.ac.uk/spm>), running on MATLAB version  
47 7.5 (MathWorks, Natick, Massachusetts, USA). This process focused on specific  
48 neonatal priors, including grey matter, white matter, cerebrospinal fluid, deep grey  
49 matter, the cerebellum and brainstem, which have previously been described in detail  
50 <sup>17 35</sup>. We used the tissue class images created during segmentation to generate a  
51  
52  
53  
54  
55  
56  
57  
58  
59  
60

1  
2  
3 custom template to improve coregistration using Diffeomorphic Anatomical  
4  
5 Registration Through an Exponential Lie algebra algorithm (DARTEL).<sup>37</sup> After this  
6  
7 step the images were modulated via SPM 8 software to improve the inter-subject  
8  
9 registration.. The Easy Volume Toolbox<sup>38</sup> was used to extract the global brain tissue  
10  
11 volumes from the segmented, normalized and modulated images of each child.  
12  
13

### 14 **Statistical analyses**

15  
16 The analyses were carried out with SPSS for Windows, version 22.0 (SPSS Inc,  
17  
18 Chicago, Illinois, USA) and the data were checked for normality, homogeneity and  
19  
20 outliers. In order to compare the groups, we used the Student's t-test and Mann  
21  
22 Whitney U test for continuous variables and the chi-square test or Fisher's exact test  
23  
24 for categorical data, as appropriate. The associations between brain volumes, VMI  
25  
26 scores and fine motor skills scores were explored using partial correlation. Total  
27  
28 cerebral parenchyma (CPAR) – the sum of the grey matter and white matter,  
29  
30 excluding cerebrospinal fluid - was used as a covariate to control for generalized  
31  
32 scaling effects. Because sex, GA at birth and the GA at the time of the scan have  
33  
34 previously been shown to influence brain volume size in preterm children<sup>39 40</sup> we  
35  
36 performed the analyses with different covariate pairs. First we used CPAR and GA at  
37  
38 birth, then we used CPAR and the GA at scan and finally we used CPAR and sex.  
39  
40 GA at birth and GA at scan did not influence the results, but sex did, so CPAR and  
41  
42 sex were chosen as the covariates in the final model. There was one multivariate  
43  
44 outlier which was identified by the Mahalanobis distance when we investigated the  
45  
46 atlas segmentation data in relation to the fine motor skills scores, and this child was  
47  
48 excluded from those analyses. Bonferroni's correction for multiple comparisons was  
49  
50 not applied because of the exploratory nature of the study and the reduced sample  
51  
52 size examined<sup>41-43</sup>. The level of significance was set at a two-sided p-value of <0.05.  
53  
54  
55  
56  
57  
58  
59  
60

## Results

### *Study population*

A summary of the study population is presented in **Figure 1** and their perinatal characteristics are presented in **Table 1**.

**Table 1.** Characteristics of the 66 children born at gestational age below 27 weeks and without major brain lesions or cerebral palsy (n = 66)

|                                                       |                  |
|-------------------------------------------------------|------------------|
| Gestational age at birth, weeks, median (range)       | 25.6 (23.4-26.6) |
| Birth weight, grams, mean (SD)                        | 839 (152)        |
| Gender, girls/boys                                    | 29/37            |
| Small for gestational age, n (%)                      | 4 (6)            |
| Prenatal steroids, n (%)                              | 60 (91)          |
| Premature Rupture of the Membranes, n (%)             | 19 (29)          |
| Cesarean section, n (%)                               | 32 (48)          |
| Sepsis, n (%)                                         | 51 (77)          |
| Days of mechanical ventilation, median (range)        | 7 (0-55)         |
| Postnatal steroids, n (%)                             | 11 (17)          |
| Bronchopulmonary dysplasia, oxygen at 36 weeks, n (%) | 26 (39)          |
| Necrotizing Enterocolitis, n (%)                      | 6 (9)            |
| Patent Ductus Arteriosus, ligation, n (%)             | 20 (30)          |
| Laser treatment for Retinopathy of Prematurity, n (%) | 8 (12)           |
| Intraventricular hemorrhage grade I-II, n (%)         | 23 (35)          |

SD = Standard Deviation, n = number. Sepsis was defined as positive blood culture or clinical picture of sepsis in association with elevated C-reactive protein or leukocyte count. Data on small for gestational age was missing for four children.

1  
2  
3  
4  
5  
6 At the time of the scan, the median (range) GA in the 66 children without major brain  
7 lesions or CP was 40.8 (39.1-45.3) weeks and for the assessment of VMI and fine  
8 motor skills it was 6 years 5 months (6 years 3 months - 7 years 2 months).

9  
10  
11  
12 The subsample of 34 children with high-quality MRI scans was representative of the  
13 whole cohort with regard to their perinatal and neonatal characteristics, findings on  
14 structural MRI, gestational age at MRI, age at assessment at 6.5 years and mean  
15 VMI and fine motor score (**Supplementary Table 1**). During the atlas-based  
16 segmentation process, 8 subjects had co-registration failure, leaving 26 children in  
17 the final sample. These 26 children were also representative of the cohort of 66  
18 children with regard to the above characteristics, except for days on mechanical  
19 ventilation, which was a median (range) of 3 (0-36) days for the sub-sample versus  
20 10 (0-55) days for the other children ( $p=0.04$ ) (**Supplementary Table 2**).

### 31 32 33 **Assessment at 6.5 years of age**

34  
35  
36 The mean (SD) VMI standard score for the 66 children without major brain lesions or  
37 CP was 93 (10), 7 points (0.5 SD) below the norm. The mean (SD) VMI scores for  
38 the 29 girls was higher than for the 37 boys: mean (SD) at 96 (10) versus 90 (8),  
39 respectively ( $p=0.02$ ).

40  
41  
42 The mean (SD) fine motor skills score was 8 (3), which was 2 points (0.5 SD) below  
43 the norm, and there were no significant sex differences as the girls scored 8 (3) and  
44 the boys 7 (3) ( $p=0.16$ ).

45  
46  
47 None of the children included in the study had a visual impairment.

### 48 49 50 **Brain volumes and associations with VMI and fine motor skills**

51  
52  
53 We identified a number of regions that demonstrated significant associations

1  
2  
3 between brain volumes, VMI and fine motor skills scores. VMI performance showed a  
4 positive correlation with the volume of the precentral gyrus (partial  $r=0.54$ ,  $p=0.007$ ),  
5  
6 whereas the fine motor skills scores showed a positive correlation with the volumes  
7  
8 of the precentral gyrus (partial  $r = 0.54$ ,  $p=0.01$ ), the cerebellum (partial  $r = 0.42$ ,  
9  
10  $p=0.02$ ) and the brainstem (partial  $r = 0.47$   $p=0.008$ ) and a negative correlation with  
11  
12 cortical grey matter volume (partial  $r = -0.38$ ,  $p=0.04$ ) (**Figure 2**). All the correlation  
13  
14 analyses can be found in **Supplementary Table 3**.  
15  
16

## 17 18 **Discussion**

19  
20 In this exploratory study, the associations between brain volumes at term equivalent  
21  
22 age and VMI and fine motor skills at 6.5 years in children born EPT without major  
23  
24 brain lesions or CP were explored in regions of the brain previously reported to be  
25  
26 involved in those functions. The volume of the precentral gyrus showed a positive  
27  
28 correlation with both VMI and fine motor skills, and the volumes of the cerebellum  
29  
30 and the brainstem correlated positively to fine motor skills. Total cortical grey matter  
31  
32 volume showed a negative correlation with fine motor skills.  
33  
34

35  
36 The group scores for the children included in this study were below the test norms on  
37  
38 both VMI and fine motor skills, which was in line with previous studies where children  
39  
40 born preterm have consistently shown poorer VMI performance and fine motor skills  
41  
42 compared to children born at term<sup>7 44</sup>. However, the lower group performance is still  
43  
44 considered to be within low average range. Within this relatively well-functioning  
45  
46 group of children born EPT, we found a small, but statistically significant, difference  
47  
48 between the sexes with regards to VMI performance, with girls outperforming boys.  
49  
50 Sex differences in VMI performance have consistently been reported in children born  
51  
52 preterm<sup>7</sup> and MRI studies of children born preterm have revealed differences  
53  
54 between the sexes in brain volumes and the microstructure of the brain<sup>39 45 46</sup>,  
55  
56  
57  
58  
59  
60

1  
2  
3 indicating altered early development of the brain in boys born preterm. This indicates  
4 that the brain of preterm born boys develops in an altered way compared to preterm  
5 born girls, affecting both the structure and the function of the brain.  
6  
7

8  
9  
10 Cerebellar underdevelopment, with reductions in cerebellar volume, and sustained  
11 white matter injuries in children born preterm, have been suggested as possible  
12 mechanisms for poor visuo-motor function<sup>47 9 23</sup>, although many neural networks  
13 comprised of other neural structures have also been proposed to be involved in VMI  
14 including the visual, motor, sensory, salience and default mode networks, the  
15 subcortical regions and the brain stem<sup>21 48</sup>. Even though this study is the first, to our  
16 knowledge, to explore the associations between brain volumes at term equivalent  
17 age and VMI at 6.5 years in a cohort of children born EPT, there have been previous  
18 reports of associations between brain volumes and VMI performance in more mature  
19 preterm children. In these reports, positive correlations were seen between the  
20 growth rate of the caudate and the thalamus during the neonatal period and VMI  
21 scores at 4 years of age<sup>24</sup>, and between thalamic and cerebellar white matter  
22 volumes and VMI scores at 15 years of age<sup>22</sup>. We did not find these associations in  
23 our cohort and this finding was in line with a previous study that evaluated 8-year-old  
24 children born preterm<sup>49</sup>. One explanation for these different results could be  
25 individual childhood growth trajectories and different gestational ages in the various  
26 study cohorts. Additional studies using inductive (exploration) and deductive  
27 (hypotheses-driven) approaches will be useful in determining the relationships  
28 between VMI and neural structure.  
29  
30  
31  
32  
33  
34  
35  
36  
37  
38  
39  
40  
41  
42  
43  
44  
45  
46  
47  
48  
49  
50

51 VMI performance is dependent on fine motor skills. And, fine motor skills have been  
52 shown to be a facilitator of visuo-motor function even though the causality of this  
53 mediation is not known<sup>47</sup>. The present study revealed positive correlations between  
54  
55  
56  
57  
58  
59  
60

1  
2  
3 better fine motor skills and larger volumes of the precentral gyrus, the cerebellum and  
4  
5 the brainstem - motor areas of the brain that have been reported to be involved in  
6  
7 fine motor skills<sup>50</sup>. The precentral gyrus, which is located in the frontal lobe, is the  
8  
9 origin of the corticospinal tracts known to affect motor functions. A smaller precentral  
10  
11 gyrus could, therefore, be expected to be correlated with reduced motor performance  
12  
13 and also to diminished VMI performance, in line with our findings, since fine motor  
14  
15 skills have been shown to be a mediator of visuo-motor function, even though the  
16  
17 cause of this mediation is not known<sup>47</sup>. Both the cerebellum and the brain stem are  
18  
19 important for fine motor skills and VMI, as well as for other tasks that rely on the  
20  
21 motor system<sup>48</sup>, and our results support their important role in this cross-modal  
22  
23 function. In addition, the cerebellum has long been known to be involved in  
24  
25 movement modulation, balance and coordination, and there is now evidence that it is  
26  
27 also important for a number of cognitive functions, including visuospatial attention<sup>51</sup>.  
28  
29 Finally, cerebellar growth has been shown to relate to visual perception at school age  
30  
31 in children born very preterm<sup>52</sup> and specific sub-regional volumes of the cerebellum  
32  
33 have been shown to be related to VMI and influenced by other perinatal factors, such  
34  
35 as pain and infections<sup>52</sup>. Taken together, the literature suggests that neurocorrelates  
36  
37 for fine motor skills are important for VMI performance as well, whether the  
38  
39 neurocorrelates are contributing to VMI performance directly, or indirectly, through  
40  
41 fine motor skills. The current findings suggest that the brain growth of the precentral  
42  
43 gyrus, cerebellum and brainstem have already altered during the neonatal period and  
44  
45 that this affects functions such as VMI and fine motor skills.

46  
47  
48  
49  
50  
51 We were surprised to find a negative correlation between cortical grey matter volume  
52  
53 and fine motor skills in our cohort, despite the fact that Keunen et al reported a  
54  
55 similar finding. Those authors also reported an inverse relationship between cortical  
56  
57



1  
2  
3 grey matter volume and fine motor function when children who were born preterm  
4 reached 2.5 years <sup>20</sup>. Measuring the cortical grey volume depends on the  
5  
6 segmentation methods used to separate grey matter from the cerebellum which could  
7  
8 make the classifying cortical grey matter volume imprecise. It is also possible that  
9  
10 atypical patterns of brain development play a role in the grey matter volume and fine  
11  
12 motor skills relationship, in the preterm brain <sup>16</sup>.  
13  
14  
15

16  
17 A strength of this study is its population-based prospective cohort study design. The  
18  
19 study focused on children born EPT without major brain lesions, which meant that our  
20  
21 cohort was relatively healthy. This was reflected in their average range performances  
22  
23 on both the VMI and the fine motor skills tests, with a mean of only -0.5 SD below the  
24  
25 norms, which is higher than previously reported in preterm populations. This study  
26  
27 also has several limitations. We had to exclude many children from the morphometric  
28  
29 analyses, due to the strict criteria for data quality, and this was a reflection of the  
30  
31 well-known difficulties in processing neonatal MRI images in children born EPT. This  
32  
33 left us with a relatively small sample size, although the children with morphometric  
34  
35 data were largely representative of the whole cohort. This was due to rigorous entry  
36  
37 and data quality criteria, as well as implicit methodological difficulties related to the  
38  
39 scanning of preterm infants. Scanning preterm neonates is considered a challenging  
40  
41 task due to their immature physiology and anatomy. Patient motion may occur more  
42  
43 often thus patient preparation and image protocols should be modified and be  
44  
45 dedicated for neonates. To minimize this limitation the development of novel pulse  
46  
47 sequences to increase the speed of image acquisition, and MRI coils tailored to the  
48  
49 head size of the subject, would have the potential to further increase success <sup>53</sup>.  
50  
51  
52

53  
54 Segmentation of cerebral tissues at term-equivalent age in children who were born  
55  
56 extremely preterm is challenging due to the characteristics of the developing preterm  
57  
58

1  
2  
3 brain. The segmentation can be limited in small structures of the brain since the  
4  
5 volumes are smaller and there is also a lower signal-to-noise ratio in preterm  
6  
7 children. To minimize this we used only high quality MRI. To guide segmentation we  
8  
9 used a larger number of tissue probability maps from preterms<sup>35</sup> with an extra class  
10  
11 tissue map for background, to provide a better modelling of the cerebrospinal fluid  
12  
13 and other non-brain voxels and also to aid further tissue classification. Visual-motor  
14  
15 integration was assessed with the main Beerys VMI test, but did not include the  
16  
17 supplementary tests of visual perception and motor coordination which could have  
18  
19 enabled us to distinguish between visual perception and fine motor function with  
20  
21 regard to the VMI function. We did not adjust for any diagnosis of autism or ADHD,  
22  
23 which are reported to be common in children born extremely preterm<sup>54</sup> and have  
24  
25 been linked to altered brain development in preterms<sup>36 55</sup> Finally, we were not able to  
26  
27 include a control group of children born at term.  
28  
29

### 30 *Conclusion*

31  
32 In summary, this study found positive correlations between VMI performance, fine  
33  
34 motor skills and brain volumes at term-equivalent age in regions that were already  
35  
36 known to be involved in these functions. To our knowledge, this is the first study to  
37  
38 examine the relationship between neonatal brain volumes and VMI and fine motor  
39  
40 skills at the age of 6.5 years in a population-based cohort of children born EPT.  
41  
42 Further studies including larger sample sizes are needed to confirm our results, to  
43  
44 explore the relationships between the underlying visual and motor modalities and  
45  
46 VMI in greater depth, and to examine the potential use of early regional brain  
47  
48 volumes as imaging biomarkers related to VMI and fine motor skills. Since it has  
49  
50 been reported that early interventions can improve VMI in general school populations  
51  
52  
53  
54  
55  
56  
57  
58  
59  
60

1  
2  
3 <sup>56</sup> as well as in children born preterm <sup>57</sup> , a possibility of early identification of children  
4  
5 at risk could diminish the impact of preterm birth on these functions.  
6  
7

8 **Ethical approval:** All procedures performed in studies involving human participants  
9  
10 were in accordance with the ethical standards of the institutional and/or national  
11  
12 research committee and with the 1964 Helsinki declaration and its later amendments  
13  
14 or comparable ethical standards.  
15

16  
17 **Informed consent:** Informed consent was obtained from the parents of all individual  
18  
19 participants included in the study.  
20  
21

#### 22 **Author's contributions:**

23  
24 J Bolk designed the study, collected data, performed analyses, interpreted the data,  
25  
26 drafted and revised the manuscript and approved the final version.  
27

28  
29 N Padilla designed the study, collected data, performed analyses, interpreted the  
30  
31 data, revised the manuscript and approved the final version.  
32

33  
34 L Broström collected data, interpreted data, revised the manuscript and approved the  
35  
36 final version.  
37

38  
39 L Forsman collected data, interpreted data, revised the manuscript and approved the  
40  
41 final version.  
42

43  
44 K Hellgren collected data, interpreted data, revised the manuscript and approved the  
45  
46 final version.  
47

48  
49 U Åden designed the study, collected data, interpreted the data, revised the  
50  
51 manuscript and approved the final version  
52

#### 53 **Acknowledgements**

54  
55 We sincerely thank all the participating children and parents for making this study  
56  
57 possible.  
58

We want to thank our research nurse Lena Swartling-Schlinzig and our psychologist Eva Eklöf, the NeoBIG group and the EXPRESS group.

**Abbreviations:** *Cerebral palsy (CP), Sum of grey and white matter excluding cerebrospinal fluid (CPAR), Extremely Preterm Born (EPT), Gestational age (GA), Magnetic Resonance Imaging (MRI), Movement Assessment Battery for Children-2 (M-ABC), Standard Deviation (SD), Visual-motor integration (VMI)*

**Data sharing statement:** Any requests for data sharing should be addressed to author U.Å.

## References

1. Aylward GP. Neurodevelopmental outcomes of infants born prematurely. *Journal of developmental and behavioral pediatrics* : *JDBP* 2005;26(6):427-40. [published Online First: 2005/12/14]
2. Daly CJ, Kelley GT, Krauss A. Relationship between visual-motor integration and handwriting skills of children in kindergarten: a modified replication study. *The American journal of occupational therapy* : *official publication of the American Occupational Therapy Association* 2003;57(4):459-62. [published Online First: 2003/08/13]
3. Volman MJ, van Schendel BM, Jongmans MJ. Handwriting difficulties in primary school children: a search for underlying mechanisms. *The American journal of occupational therapy* : *official publication of the American Occupational Therapy Association* 2006;60(4):451-60. [published Online First: 2006/08/19]
4. Weil MJ, Amundson SJ. Relationship between visuomotor and handwriting skills of children in kindergarten. *The American journal of occupational therapy* : *official*

- 1  
2  
3 *publication of the American Occupational Therapy Association*  
4  
5 1994;48(11):982-8. [published Online First: 1994/11/01]  
6  
7 5. Sortor JM, Kulp MT. Are the results of the Beery-Buktenica Developmental Test of  
8  
9 Visual-Motor Integration and its subtests related to achievement test scores?  
10  
11 *Optometry and vision science : official publication of the American Academy of*  
12  
13 *Optometry* 2003;80(11):758-63. [published Online First: 2003/11/25]  
14  
15 6. Vuijk PJ, Hartman E, Mombarg R, et al. Associations between academic and  
16  
17 motor performance in a heterogeneous sample of children with learning  
18  
19 disabilities. *Journal of learning disabilities* 2011;44(3):276-82. doi:  
20  
21 10.1177/0022219410378446 [published Online First: 2011/04/28]  
22  
23 7. Geldof CJ, van Wassenae AG, de Kieviet JF, et al. Visual perception and visual-  
24  
25 motor integration in very preterm and/or very low birth weight children: a meta-  
26  
27 analysis. *Research in developmental disabilities* 2012;33(2):726-36. doi:  
28  
29 10.1016/j.ridd.2011.08.025 [published Online First: 2011/11/26]  
30  
31 8. Williams J, Lee KJ, Anderson PJ. Prevalence of motor-skill impairment in preterm  
32  
33 children who do not develop cerebral palsy: a systematic review. *Dev Med*  
34  
35 *Child Neurol* 2010;52(3):232-7. doi: 10.1111/j.1469-8749.2009.03544.x  
36  
37 [published Online First: 2009/12/17]  
38  
39 9. Van Braeckel KN, Taylor HG. Visuospatial and visuomotor deficits in preterm  
40  
41 children: the involvement of cerebellar dysfunctioning. *Dev Med Child Neurol*  
42  
43 2013;55 Suppl 4:19-22. doi: 10.1111/dmnc.12301 [published Online First:  
44  
45 2013/11/28]  
46  
47 10. Setanen S, Lehtonen L, Parkkola R, et al. The motor profile of preterm infants at  
48  
49 11 y of age. *Pediatric research* 2016;80(3):389-94. doi: 10.1038/pr.2016.90  
50  
51 [published Online First: 2016/04/14]  
52  
53  
54  
55  
56  
57  
58  
59  
60

- 1  
2  
3 11. Wong T, Taylor HG, Klein N, et al. Kindergarten classroom functioning of  
4 extremely preterm/extremely low birth weight children. *Early human*  
5 *development* 2014;90(12):907-14. doi: 10.1016/j.earlhumdev.2014.09.011  
6  
7  
8 [published Online First: 2014/12/03]  
9  
10  
11 12. Twilhaar ES, de Kieviet JF, Aarnoudse-Moens CS, et al. Academic performance  
12 of children born preterm: a meta-analysis and meta-regression. *Archives of*  
13 *disease in childhood Fetal and neonatal edition* 2017 doi:  
14  
15 10.1136/archdischild-2017-312916 [published Online First: 2017/08/30]  
16  
17  
18  
19 13. Johnson S, Hennessy E, Smith R, et al. Academic attainment and special  
20 educational needs in extremely preterm children at 11 years of age: the  
21 EPICure study. *Archives of disease in childhood Fetal and neonatal edition*  
22 2009;94(4):F283-9. doi: 10.1136/adc.2008.152793 [published Online First:  
23  
24 2009/03/14]  
25  
26  
27  
28  
29  
30 14. Bonifacci P. Children with low motor ability have lower visual-motor integration  
31 ability but unaffected perceptual skills. *Human movement science*  
32 2004;23(2):157-68. doi: 10.1016/j.humov.2004.08.002 [published Online First:  
33  
34 2004/10/12]  
35  
36  
37  
38  
39 15. Goyen TA, Lui K, Woods R. Visual-motor, visual-perceptual, and fine motor  
40 outcomes in very-low-birthweight children at 5 years. *Dev Med Child Neurol*  
41 1998;40(2):76-81. [published Online First: 1998/03/07]  
42  
43  
44  
45 16. Haartsen R, Jones EJH, Johnson MH. Human brain development over the early  
46 years. *Current Opinion in Behavioral Sciences* 2016;10:149-54. doi:  
47  
48 10.1016/j.cobeha.2016.05.015  
49  
50  
51  
52 17. Padilla N, Alexandrou G, Blennow M, et al. Brain Growth Gains and Losses in  
53 Extremely Preterm Infants at Term. *Cerebral cortex (New York, NY : 1991)*  
54  
55  
56  
57  
58  
59  
60

- 2015;25(7):1897-905. doi: 10.1093/cercor/bht431 [published Online First: 2014/02/04]
18. Monson BB, Anderson PJ, Matthews LG, et al. Examination of the Pattern of Growth of Cerebral Tissue Volumes From Hospital Discharge to Early Childhood in Very Preterm Infants. *JAMA pediatrics* 2016;170(8):772-9. doi: 10.1001/jamapediatrics.2016.0781 [published Online First: 2016/07/02]
19. Loh WY, Anderson PJ, Cheong JLY, et al. Neonatal basal ganglia and thalamic volumes: very preterm birth and 7-year neurodevelopmental outcomes. *Pediatric research* 2017 doi: 10.1038/pr.2017.161 [published Online First: 2017/07/13]
20. Keunen K, Isgum I, van Kooij BJ, et al. Brain Volumes at Term-Equivalent Age in Preterm Infants: Imaging Biomarkers for Neurodevelopmental Outcome through Early School Age. *J Pediatr* 2016;172:88-95. doi: 10.1016/j.jpeds.2015.12.023 [published Online First: 2016/01/18]
21. Sepulcre J. Integration of visual and motor functional streams in the human brain. *Neuroscience letters* 2014;567:68-73. doi: 10.1016/j.neulet.2014.03.050 [published Online First: 2014/04/05]
22. Martinussen M, Flanders DW, Fischl B, et al. Segmental brain volumes and cognitive and perceptual correlates in 15-year-old adolescents with low birth weight. *J Pediatr* 2009;155(6):848-53.e1. doi: 10.1016/j.jpeds.2009.06.015 [published Online First: 2009/08/18]
23. Sripada K, Lohaugen GC, Eikenes L, et al. Visual-motor deficits relate to altered gray and white matter in young adults born preterm with very low birth weight. *NeuroImage* 2015;109:493-504. doi: 10.1016/j.neuroimage.2015.01.019 [published Online First: 2015/01/17]

- 1  
2  
3 24. Young JM, Powell TL, Morgan BR, et al. Deep grey matter growth predicts  
4 neurodevelopmental outcomes in very preterm children. *NeuroImage*  
5 2015;111:360-8. doi: 10.1016/j.neuroimage.2015.02.030 [published Online  
6  
7 First: 2015/02/26]  
8  
9  
10  
11 25. Serenius F, Ewald U, Farooqi A, et al. Neurodevelopmental Outcomes Among  
12 Extremely Preterm Infants 6.5 Years After Active Perinatal Care in Sweden.  
13 *JAMA pediatrics* 2016 doi: 10.1001/jamapediatrics.2016.1210 [published  
14  
15 Online First: 2016/08/02]  
16  
17  
18  
19  
20 26. Serenius F, Kallen K, Blennow M, et al. Neurodevelopmental outcome in  
21 extremely preterm infants at 2.5 years after active perinatal care in Sweden.  
22 *Jama* 2013;309(17):1810-20. doi: 10.1001/jama.2013.3786 [published Online  
23  
24 First: 2013/05/02]  
25  
26  
27  
28  
29 27. Inder TE, Wells SJ, Mogridge NB, et al. Defining the nature of the cerebral  
30 abnormalities in the premature infant: a qualitative magnetic resonance  
31 imaging study. *J Pediatr* 2003;143(2):171-9. doi: 10.1067/s0022-  
32  
33 3476(03)00357-3 [published Online First: 2003/09/13]  
34  
35  
36  
37 28. Surveillance of cerebral palsy in Europe: a collaboration of cerebral palsy surveys  
38 and registers. Surveillance of Cerebral Palsy in Europe (SCPE). *Dev Med*  
39  
40 *Child Neurol* 2000;42(12):816-24. [published Online First: 2000/12/29]  
41  
42  
43  
44 29. Jones JG, MacKinnon B, Good WV, et al. The early treatment for ROP (ETROP)  
45 randomized trial: study results and nursing care adaptations. *Insight (American*  
46  
47 *Society of Ophthalmic Registered Nurses)* 2005;30(2):7-13. [published Online  
48  
49 First: 2005/09/02]  
50  
51  
52  
53  
54  
55  
56  
57  
58  
59  
60



- 1  
2  
3 30. Beery K.E BNA. The Beery-Buktenica developmental test of visual motor  
4 integration: Administration, scoring and teaching manual (5th ed.).  
5  
6 Minneapolis: NCS Pearson Inc 2006.  
7  
8  
9 31. Henderson SE SD, Barnett AL. Movement assessment battery for children-2  
10 second edition [Movement ABC-2]. London, UK: The Psychological  
11 Corporation 2007.  
12  
13  
14  
15 32. Hyvarinen L, Nasanen R, Laurinen P. New visual acuity test for pre-school  
16 children. *Acta ophthalmologica* 1980;58(4):507-11. [published Online First:  
17 1980/08/01]  
18  
19  
20  
21  
22 33. Skiold B, Horsch S, Hallberg B, et al. White matter changes in extremely preterm  
23 infants, a population-based diffusion tensor imaging study. *Acta paediatrica*  
24 2010;99(6):842-9. doi: 10.1111/j.1651-2227.2009.01634.x  
25  
26  
27  
28  
29 34. Shi F, Yap PT, Wu G, et al. Infant brain atlases from neonates to 1- and 2-year-  
30 olds. *PloS one* 2011;6(4):e18746. doi: 10.1371/journal.pone.0018746  
31 [published Online First: 2011/05/03]  
32  
33  
34  
35 35. Kuklisova-Murgasova M, Aljabar P, Srinivasan L, et al. A dynamic 4D probabilistic  
36 atlas of the developing brain. *NeuroImage* 2011;54(4):2750-63. doi:  
37 10.1016/j.neuroimage.2010.10.019 [published Online First: 2010/10/26]  
38  
39  
40  
41 36. Padilla N, Eklof E, Martensson GE, et al. Poor Brain Growth in Extremely Preterm  
42 Neonates Long Before the Onset of Autism Spectrum Disorder Symptoms.  
43  
44 *Cerebral cortex (New York, NY : 1991)* 2015 doi: 10.1093/cercor/bhv300  
45 [published Online First: 2015/12/23]  
46  
47  
48  
49  
50 37. Ashburner J. A fast diffeomorphic image registration algorithm. *NeuroImage*  
51 2007;38(1):95-113. doi: 10.1016/j.neuroimage.2007.07.007 [published Online  
52 First: 2007/09/01]  
53  
54  
55  
56  
57  
58  
59  
60

- 1  
2  
3 38. Pernet C, Andersson J, Paulesu E, et al. When all hypotheses are right: a  
4 multifocal account of dyslexia. *Human brain mapping* 2009;30(7):2278-92. doi:  
5 10.1002/hbm.20670 [published Online First: 2009/02/25]  
6  
7  
8  
9 39. Skiold B, Alexandrou G, Padilla N, et al. Sex differences in outcome and  
10 associations with neonatal brain morphology in extremely preterm children. *J*  
11 *Pediatr* 2014;164(5):1012-8. doi: 10.1016/j.jpeds.2013.12.051 [published  
12 *Pediatr* 2014;164(5):1012-8. doi: 10.1016/j.jpeds.2013.12.051 [published  
13 Online First: 2014/02/18]  
14  
15  
16  
17 40. Keunen K, Kersbergen KJ, Groenendaal F, et al. Brain tissue volumes in preterm  
18 infants: prematurity, perinatal risk factors and neurodevelopmental outcome: a  
19 systematic review. *J Matern Fetal Neonatal Med* 2012;25 Suppl 1:89-100. doi:  
20 10.3109/14767058.2012.664343 [published Online First: 2012/02/22]  
21  
22  
23  
24 41. Perneger TV. What's wrong with Bonferroni adjustments. *BMJ (Clinical research*  
25 *ed)* 1998;316(7139):1236-8. [published Online First: 1998/05/16]  
26  
27  
28  
29 42. Rothman KJ. No adjustments are needed for multiple comparisons. *Epidemiology*  
30 *(Cambridge, Mass)* 1990;1(1):43-6. [published Online First: 1990/01/01]  
31  
32  
33  
34 43. Nakagawa S. A farewell to Bonferroni: the problems of low statistical power and  
35 publication bias. *Behavioral Ecology* 2004;15(6):1044-45. doi:  
36 10.1093/beheco/arh107  
37  
38  
39  
40 44. de Kieviet JF, Piek JP, Aarnoudse-Moens CS, et al. Motor development in very  
41 preterm and very low-birth-weight children from birth to adolescence: a meta-  
42 analysis. *Jama* 2009;302(20):2235-42. doi: 10.1001/jama.2009.1708  
43  
44  
45  
46  
47  
48 [published Online First: 2009/11/26]  
49  
50 45. Kesler SR, Reiss AL, Vohr B, et al. Brain volume reductions within multiple  
51 cognitive systems in male preterm children at age twelve. *J Pediatr*  
52  
53  
54  
55  
56  
57  
58  
59  
60

- 1  
2  
3 2008;152(4):513-20, 20.e1. doi: 10.1016/j.jpeds.2007.08.009 [published  
4  
5 Online First: 2008/03/19]  
6  
7 46. Constable RT, Ment LR, Vohr BR, et al. Prematurely born children demonstrate  
8  
9 white matter microstructural differences at 12 years of age, relative to term  
10  
11 control subjects: an investigation of group and gender effects. *Pediatrics*  
12  
13 2008;121(2):306-16. doi: 10.1542/peds.2007-0414 [published Online First:  
14  
15 2008/02/05]  
16  
17 47. Thomas AR, Lacadie C, Vohr B, et al. Fine Motor Skill Mediates Visual Memory  
18  
19 Ability with Microstructural Neuro-correlates in Cerebellar Peduncles in  
20  
21 Prematurely Born Adolescents. *Cerebral cortex (New York, NY : 1991)* 2017  
22  
23 doi: 10.1093/cercor/bhw415 [published Online First: 2017/01/22]  
24  
25  
26 48. Braddick O, Atkinson J. Development of human visual function. *Vision research*  
27  
28 2011;51(13):1588-609. doi: 10.1016/j.visres.2011.02.018 [published Online  
29  
30 First: 2011/03/02]  
31  
32  
33 49. Peterson BS, Vohr B, Staib LH, et al. Regional brain volume abnormalities and  
34  
35 long-term cognitive outcome in preterm infants. *Jama* 2000;284(15):1939-47.  
36  
37 [published Online First: 2000/10/18]  
38  
39 50. Holmstrom L, de Manzano O, Vollmer B, et al. Dissociation of brain areas  
40  
41 associated with force production and stabilization during manipulation of  
42  
43 unstable objects. *Experimental brain research* 2011;215(3-4):359-67. doi:  
44  
45 10.1007/s00221-011-2903-9 [published Online First: 2011/11/01]  
46  
47  
48 51. Noroozian M. The role of the cerebellum in cognition: beyond coordination in the  
49  
50 central nervous system. *Neurologic clinics* 2014;32(4):1081-104. doi:  
51  
52 10.1016/j.ncl.2014.07.005 [published Online First: 2014/12/03]  
53  
54  
55  
56  
57  
58  
59  
60

- 1  
2  
3 52. Ranger M, Zwicker JG, Chau CM, et al. Neonatal Pain and Infection Relate to  
4  
5 Smaller Cerebellum in Very Preterm Children at School Age. *J Pediatr*  
6  
7 2015;167(2):292-8.e1. doi: 10.1016/j.jpeds.2015.04.055 [published Online  
8  
9 First: 2015/05/20]  
10  
11 53. Smyser CD, Kidokoro H, Inder TE. Magnetic resonance imaging of the brain at  
12  
13 term equivalent age in extremely premature neonates: to scan or not to scan?  
14  
15 *J Paediatr Child Health* 2012;48(9):794-800. doi: 10.1111/j.1440-  
16  
17 1754.2012.02535.x [published Online First: 2012/09/14]  
18  
19  
20 54. D'Onofrio BM, Class QA, Rickert ME, et al. Preterm birth and mortality and  
21  
22 morbidity: a population-based quasi-experimental study. *JAMA psychiatry*  
23  
24 2013;70(11):1231-40. doi: 10.1001/jamapsychiatry.2013.2107 [published  
25  
26 Online First: 2013/09/27]  
27  
28  
29 55. Bora S, Pritchard VE, Chen Z, et al. Neonatal cerebral morphometry and later risk  
30  
31 of persistent inattention/hyperactivity in children born very preterm. *Journal of*  
32  
33 *child psychology and psychiatry, and allied disciplines* 2014;55(7):828-38. doi:  
34  
35 10.1111/jcpp.12200 [published Online First: 2014/01/21]  
36  
37  
38 56. Ohi AM, Graze H, Weber K, et al. Effectiveness of a 10-week tier-1 response to  
39  
40 intervention program in improving fine motor and visual-motor skills in general  
41  
42 education kindergarten students. *The American journal of occupational*  
43  
44 *therapy : official publication of the American Occupational Therapy Association*  
45  
46 2013;67(5):507-14. doi: 10.5014/ajot.2013.008110 [published Online First:  
47  
48 2013/08/24]  
49  
50  
51 57. Van Hus JW, Jeukens-Visser M, Koldewijn K, et al. Sustained developmental  
52  
53 effects of the infant behavioral assessment and intervention program in very  
54  
55 low birth weight infants at 5.5 years corrected age. *J Pediatr*  
56  
57  
58  
59  
60

1  
2  
3 2013;162(6):1112-9. doi: 10.1016/j.jpeds.2012.11.078 [published Online First:  
4  
5 2013/01/15]  
6  
7

8 **Figure 1.** Study population  
9

10 **Figure 2.** Illustrations of partial correlations between neonatal brain volumes, visual-  
11 motor integration and fine motor skills (assessed by manual dexterity scores on the  
12 Movement Assessment Battery for Children-2) at 6.5 years of age, using plots of  
13 residuals. Analyses are adjusted for total cerebral parenchyma (grey matter plus  
14 white matter) and sex. (A) Correlations between the volume of the precentral gyrus  
15 and visual-motor integration scores. (B-E) Correlations between the volumes of the  
16 cerebellum, brainstem, precentral gyrus, grey matter and fine motor skills. Results  
17 are presented without correction for multiple comparisons.  
18  
19  
20  
21  
22  
23  
24  
25  
26  
27

28 **Supplementary Figure1.** Atlas overlaid on the sagittal, coronal and axial T1-  
29 weighted images from a single preterm child. Individual anatomical regions are color  
30 coded.  
31  
32  
33  
34  
35  
36  
37  
38  
39  
40  
41  
42  
43  
44  
45  
46  
47  
48  
49  
50  
51  
52  
53  
54  
55  
56  
57  
58  
59  
60

1  
2  
3  
4  
5  
6  
7  
8  
9  
10  
11  
12  
13  
14  
15  
16  
17  
18  
19  
20  
21  
22  
23  
24  
25  
26  
27  
28  
29  
30  
31  
32  
33  
34  
35  
36  
37  
38  
39  
40  
41  
42  
43  
44  
45  
46  
47  
48  
49  
50  
51  
52  
53  
54  
55  
56  
57  
58  
59  
60

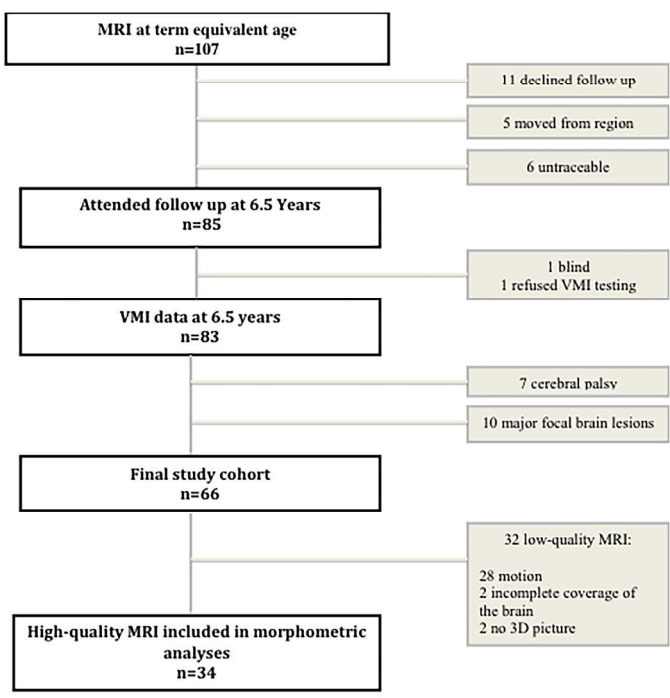

Figure 1. Study population

515x387mm (300 x 300 DPI)

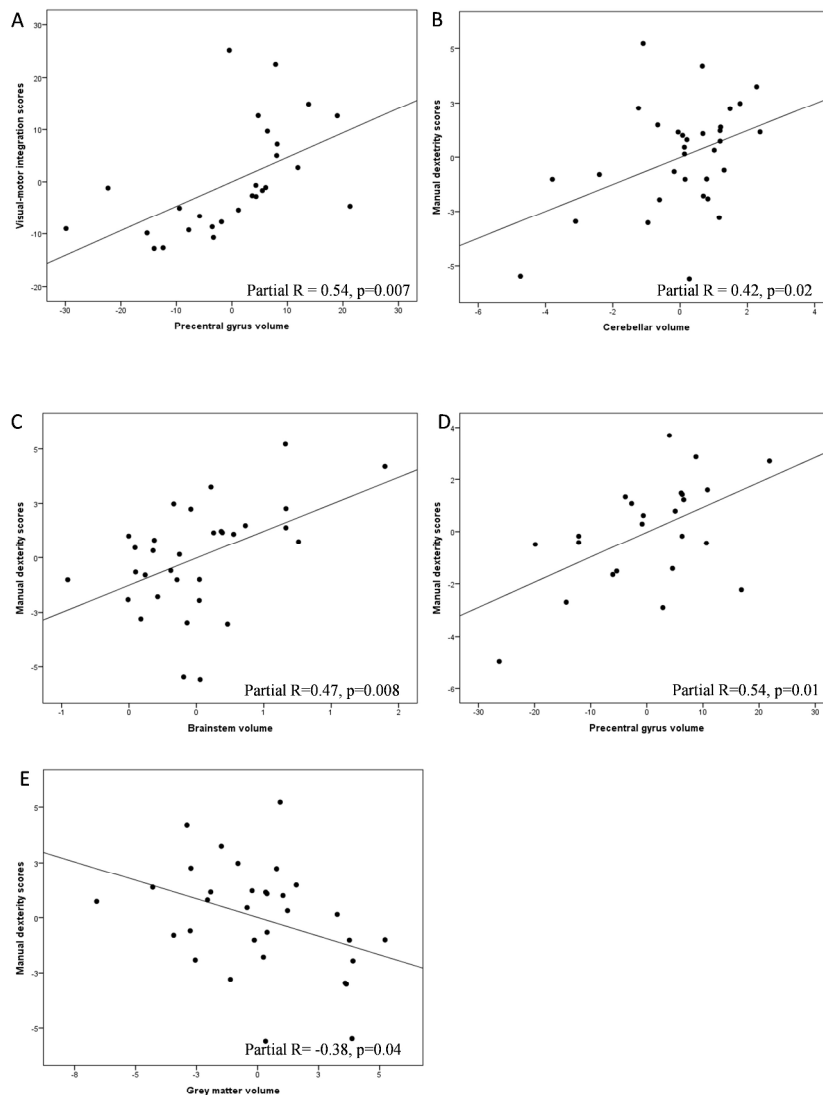

Figure 2. Illustrations of partial correlations between neonatal brain volumes, visual-motor integration and fine motor skills (assessed by manual dexterity scores on the Movement Assessment Battery for Children-2) at 6.5 years of age, using plots of residuals. Analyses are adjusted for total cerebral parenchyma (grey matter plus white matter) and sex. (A) Correlations between the volume of the precentral gyrus and visual-motor integration scores. (B-E) Correlations between the volumes of the cerebellum, brainstem, precentral gyrus, grey matter and fine motor skills. Results are presented without correction for multiple comparisons.

335x421mm (300 x 300 DPI)

1  
2  
3  
4  
5  
6  
7  
8  
9  
10  
11  
12  
13  
14  
15  
16  
17  
18  
19  
20  
21  
22  
23  
24  
25  
26  
27  
28  
29  
30  
31  
32  
33  
34  
35  
36  
37  
38  
39  
40  
41  
42  
43  
44  
45  
46  
47  
48  
49  
50  
51  
52  
53  
54  
55  
56  
57  
58  
59  
60

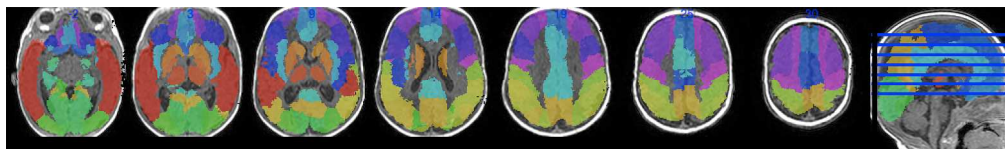

Supplementary Figure 1. Atlas overlaid on the sagittal, coronal and axial T1-weighted images from a single preterm child. Individual anatomical regions are color coded.

700x101mm (300 x 300 DPI)

For peer review only



**Supplementary Table 1.** Characteristics of the children born at gestational age <27 weeks with or without high quality MRI

|                                                    | <b>High quality MRI</b><br><b>n=34</b> | <b>Low quality MRI</b><br><b>n=32</b> | <b><i>p</i></b> |
|----------------------------------------------------|----------------------------------------|---------------------------------------|-----------------|
| Gestational age at birth, weeks, median (range)    | 25.85 (23.4-26.6)                      | 25.45 (23.4-26.6)                     | 0.16            |
| Birth weight, grams, mean (SD)                     | 857 (154)                              | 820 (47)                              | 0.33            |
| Gender, girls/boys, n                              | 15/19                                  | 14/18                                 | 1.00            |
| Small for gestational age, n                       | 1                                      | 3                                     | 0.35            |
| Prenatal steroids, n                               | 32                                     | 28                                    | 0.42            |
| Premature rupture of the membranes, n              | 10                                     | 9                                     | 1.00            |
| Cesarean section, n                                | 16                                     | 16                                    | 1.00            |
| Sepsis, n                                          | 24                                     | 27                                    | 0.24            |
| Days of mechanical ventilation, median (range)     | 3 (0-37)                               | 11 (0-55)                             | <b>0.04</b>     |
| Postnatal steroids, n                              | 4                                      | 7                                     | 0.33            |
| Bronchopulmonary Dysplasia, oxygen at 36 weeks, n  | 12                                     | 14                                    | 0.62            |
| Necrotizing enterocolitis, n                       | 1                                      | 5                                     | 0.10            |
| Patent ductus arteriosus, ligation, n              | 9                                      | 11                                    | 0.60            |
| Laser treatment for retinopathy of prematurity, n  | 2                                      | 6                                     | 0.14            |
| Intraventricular hemorrhage grade I-II, n          | 10                                     | 13                                    | 0.44            |
| Mild white matter abnormality, n                   | 18                                     | 12                                    | 0.09            |
| Gestational age at MRI, weeks, median (range)      | 40.79 (39.14-45.28)                    | 40.28 (39.14-43.28)                   | 0.08            |
| Age at 6.5 year assessment, months, median (range) | 77.20 (75.29-80.18)                    | 77.23 (76.03-86.33)                   | 0.59            |
| VMI standard score, mean (SD)                      | 94 (10)                                | 91 (9)                                | 0.20            |
| M-ABC-2 manual dexterity score, mean (SD)          | 8 (2)                                  | 7 (3)                                 | 0.68            |

1  
2  
3 All children were without cerebral palsy, focal brain lesions or severe white matter  
4  
5 abnormalities. SD = Standard deviation, MRI = Magnetic Resonance Imaging, VMI=Visual-  
6  
7 motor integration, M-ABC-2=Movement Assessment Battery for Children-2  
8  
9  
10  
11  
12  
13  
14  
15  
16  
17  
18  
19  
20  
21  
22  
23  
24  
25  
26  
27  
28  
29  
30  
31  
32  
33  
34  
35  
36  
37  
38  
39  
40  
41  
42  
43  
44  
45  
46  
47  
48  
49  
50  
51  
52  
53  
54  
55  
56  
57  
58  
59  
60

For peer review only

**Supplementary Table 2.** Characteristics of the children born at gestational age <27 weeks with and without atlas segmentation data.

|                                                    | <b>Atlas<br/>segmentation data<br/>n=26</b> | <b>No atlas<br/>segmentation data<br/>n=40</b> | <i>p</i> |
|----------------------------------------------------|---------------------------------------------|------------------------------------------------|----------|
| Gestational age at birth, weeks, median (range)    | 26.85 (23.4-26.6)                           | 25.50 (23.4-26.6)                              | 0.28     |
| Birth weight, grams, mean (SD)                     | 874 (153)                                   | 817 (146)                                      | 0.13     |
| Gender, girls/boys                                 | 13/13                                       | 16                                             | 0.46     |
| Small for gestational age, n                       | 0                                           | 4                                              | 0.15     |
| Prenatal steroids, n                               | 25/26                                       | 35                                             | 0.39     |
| Premature rupture of the membranes, n              | 7                                           | 12                                             | 1.00     |
| Cesarean Section, n                                | 10                                          | 22                                             | 0.22     |
| Sepsis, n                                          | 17                                          | 34                                             | 0.08     |
| Days of mechanical ventilation, median (range)     | 3 (0-36)                                    | 10 (0-55)                                      | 0.04     |
| Postnatal steroids, n                              | 3                                           | 8                                              | 0.51     |
| Bronchopulmonary Dysplasia, oxygen at 36 weeks, n  | 10                                          | 16                                             | 1.00     |
| Necrotizing enterocolitis, n                       | 0                                           | 6                                              | 0.07     |
| Patent ductus arteriosus, ligation, n              | 7                                           | 13                                             | 0.79     |
| Laser treatment for retinopathy of prematurity, n  | 1                                           | 7                                              | 0.13     |
| Intraventricular hemorrhage grade I-II, n          | 7                                           | 16                                             | 0.30     |
| Mild white matter abnormality, n                   | 16                                          | 14                                             | 0.09     |
| Gestational age at MRI, weeks, median (range)      | 40.93 (39.71-43.28)                         | 40.36 (39.14-45.28)                            | 0.18     |
| Age at 6.5 year assessment, months, median (range) | 77.16 (75.29-80.20)                         | 77.23 (76.03-86.33)                            | 0.21     |
| VMI standard score, mean (SD)                      | 91.69 (14.14)                               | 89.82 (11.71)                                  | 0.87     |

|                                           |       |       |      |
|-------------------------------------------|-------|-------|------|
| M-ABC-2 manual dexterity score, mean (SD) | 7 (2) | 8 (3) | 0.38 |
|-------------------------------------------|-------|-------|------|

All children were without cerebral palsy, focal brain lesions or severe white matter abnormalities.

SD = Standard deviation, MRI = Magnetic Resonance Imaging, VMI=Visual-motor integration, M-ABC-2=Movement Assessment Battery for Children-2

For peer review only

**Supplementary Table 3.** Correlations between brain volumes at term equivalent age, visual-motor integration and fine motor skills scores at 6.5 years in children born at GA <27 weeks.

| Brain region                   | Visual-motor integration            |              | Fine motor skills                   |              |
|--------------------------------|-------------------------------------|--------------|-------------------------------------|--------------|
|                                | Correlation coefficient (partial r) | p            | Correlation coefficient (partial r) | p            |
| Grey matter                    | 0.05                                | 0.77         | -0.38                               | <b>0.04</b>  |
| White matter                   | -0.33                               | 0.07         | 0.11                                | 0.57         |
| Deep grey matter               | 0.02                                | 0.93         | 0.05                                | 0.79         |
| Cerebellum                     | 0.24                                | 0.19         | 0.42                                | <b>0.02</b>  |
| Brain stem                     | 0.08                                | 0.66         | 0.47                                | <b>0.008</b> |
| Frontal lobe                   | -0.11                               | 0.61         | -0.19                               | 0.40         |
| Temporal lobe                  | -0.10                               | 0.63         | -0.12                               | 0.61         |
| Parietal lobe                  | -0.33                               | 0.12         | -0.22                               | 0.32         |
| Occipital lobe                 | 0.18                                | 0.40         | 0.26                                | 0.24         |
| Central Region                 | 0.35                                | 0.09         | 0.30                                | 0.17         |
| <b>Networks</b>                |                                     |              |                                     |              |
| <b>Visual network</b>          |                                     |              |                                     |              |
| Superior occipital gyrus       | 0.23                                | 0.28         | 0.39                                | 0.07         |
| Middle occipital gyrus         | 0.12                                | 0.59         | 0.06                                | 0.78         |
| Inferior occipital gyrus       | -0.26                               | 0.22         | -0.21                               | 0.35         |
| Calcarine cortex               | -0.24                               | 0.27         | -0.01                               | 0.97         |
| Cuneus                         | 0.27                                | 0.20         | 0.20                                | 0.37         |
| Lingual gyrus                  | -0.13                               | 0.54         | -0.01                               | 0.67         |
| <b>Motor network</b>           |                                     |              |                                     |              |
| Precentral gyrus               | 0.54                                | <b>0.007</b> | 0.54                                | <b>0.01</b>  |
| Frontal medial                 | 0.005                               | 0.99         | -0.05                               | 0.83         |
| Supplementary motor area       | -0.03                               | 0.89         | -0.19                               | 0.40         |
| <b>Sensory network</b>         |                                     |              |                                     |              |
| Postcentral gyrus              | 0.07                                | 0.75         | 0.17                                | 0.45         |
| <b>Salience network</b>        |                                     |              |                                     |              |
| Insula                         | -0.001                              | 0.99         | -0.08                               | 0.73         |
| Anterior cingulate gyrus       | 0.09                                | 0.67         | 0.10                                | 0.65         |
| Thalamus                       | -0.04                               | 0.87         | 0.11                                | 0.62         |
| Amygdala                       | -0.16                               | 0.45         | -0.23                               | 0.31         |
| <b>Default mode network</b>    |                                     |              |                                     |              |
| Precuneus                      | -0.26                               | 0.22         | -0.05                               | 0.84         |
| Angular_gyrus                  | 0.26                                | 0.21         | -0.17                               | 0.45         |
| Hippocampus                    | -0.08                               | 0.72         | -0.11                               | 0.63         |
| <b>Subcortical regions</b>     |                                     |              |                                     |              |
| Subcortical grey matter, total | -0.10                               | 0.63         | -0.04                               | 0.86         |
| Pallidum                       | 0.01                                | 0.99         | 0.07                                | 0.76         |

|         |       |      |       |      |
|---------|-------|------|-------|------|
| Caudate | -0.04 | 0.85 | -0.09 | 0.70 |
| Putamen | -0.26 | 0.23 | 0.06  | 0.79 |

All children are without cerebral palsy or major brain lesions. Results from Pearson's partial correlation, adjusted for total cerebral parenchyma (total cortical grey and white matter) and sex. Central region = precentral and postcentral gyri, rolandic operculum bilaterally. Results are presented without correction for multiple comparisons.

For peer review only

**STROBE 2007 (v4) Statement—Checklist of items that should be included in reports of *cohort studies***

| Section/Topic                | Item # | Recommendation                                                                                                                                                                       | Reported on page # |
|------------------------------|--------|--------------------------------------------------------------------------------------------------------------------------------------------------------------------------------------|--------------------|
| Title and abstract           | 1      | (a) Indicate the study's design with a commonly used term in the title or the abstract                                                                                               | 1                  |
|                              |        | (b) Provide in the abstract an informative and balanced summary of what was done and what was found                                                                                  | 2                  |
| <b>Introduction</b>          |        |                                                                                                                                                                                      |                    |
| Background/rationale         | 2      | Explain the scientific background and rationale for the investigation being reported                                                                                                 | 4-6                |
| Objectives                   | 3      | State specific objectives, including any prespecified hypotheses                                                                                                                     | 6                  |
| <b>Methods</b>               |        |                                                                                                                                                                                      |                    |
| Study design                 | 4      | Present key elements of study design early in the paper                                                                                                                              | 6                  |
| Setting                      | 5      | Describe the setting, locations, and relevant dates, including periods of recruitment, exposure, follow-up, and data collection                                                      | 6-7                |
| Participants                 | 6      | (a) Give the eligibility criteria, and the sources and methods of selection of participants. Describe methods of follow-up                                                           | 6-10               |
|                              |        | (b) For matched studies, give matching criteria and number of exposed and unexposed                                                                                                  | -                  |
| Variables                    | 7      | Clearly define all outcomes, exposures, predictors, potential confounders, and effect modifiers. Give diagnostic criteria, if applicable                                             | 7-13               |
| Data sources/<br>measurement | 8*     | For each variable of interest, give sources of data and details of methods of assessment (measurement). Describe comparability of assessment methods if there is more than one group | 7-11               |
| Bias                         | 9      | Describe any efforts to address potential sources of bias                                                                                                                            | 10-12              |
| Study size                   | 10     | Explain how the study size was arrived at                                                                                                                                            | 6-7                |
| Quantitative variables       | 11     | Explain how quantitative variables were handled in the analyses. If applicable, describe which groupings were chosen and why                                                         | 10                 |
| Statistical methods          | 12     | (a) Describe all statistical methods, including those used to control for confounding                                                                                                | 10                 |
|                              |        | (b) Describe any methods used to examine subgroups and interactions                                                                                                                  | 10                 |
|                              |        | (c) Explain how missing data were addressed                                                                                                                                          | 10-11              |
|                              |        | (d) If applicable, explain how loss to follow-up was addressed                                                                                                                       | -                  |
|                              |        | (e) Describe any sensitivity analyses                                                                                                                                                | -                  |
| <b>Results</b>               |        |                                                                                                                                                                                      |                    |

|                          |     |                                                                                                                                                                                                              |                                                        |
|--------------------------|-----|--------------------------------------------------------------------------------------------------------------------------------------------------------------------------------------------------------------|--------------------------------------------------------|
| Participants             | 13* | (a) Report numbers of individuals at each stage of study—eg numbers potentially eligible, examined for eligibility, confirmed eligible, included in the study, completing follow-up, and analysed            | 7,12,Figure 1                                          |
|                          |     | (b) Give reasons for non-participation at each stage                                                                                                                                                         | 7, 12, Figure 1                                        |
|                          |     | (c) Consider use of a flow diagram                                                                                                                                                                           | Figure 1                                               |
| Descriptive data         | 14* | (a) Give characteristics of study participants (eg demographic, clinical, social) and information on exposures and potential confounders                                                                     | 7,8,11                                                 |
|                          |     | (b) Indicate number of participants with missing data for each variable of interest                                                                                                                          | 11, Figure 1                                           |
|                          |     | (c) Summarise follow-up time (eg, average and total amount)                                                                                                                                                  | 7, 12,<br>Supplementary Table 1, Supplementary Table 2 |
| Outcome data             | 15* | Report numbers of outcome events or summary measures over time                                                                                                                                               | 12                                                     |
| Main results             | 16  | (a) Give unadjusted estimates and, if applicable, confounder-adjusted estimates and their precision (eg, 95% confidence interval). Make clear which confounders were adjusted for and why they were included | 12 Figure 2                                            |
|                          |     | (b) Report category boundaries when continuous variables were categorized                                                                                                                                    | -                                                      |
|                          |     | (c) If relevant, consider translating estimates of relative risk into absolute risk for a meaningful time period                                                                                             | -                                                      |
| Other analyses           | 17  | Report other analyses done—eg analyses of subgroups and interactions, and sensitivity analyses                                                                                                               | Supplementary Table 1, Supplementary Table 2           |
| <b>Discussion</b>        |     |                                                                                                                                                                                                              |                                                        |
| Key results              | 18  | Summarise key results with reference to study objectives                                                                                                                                                     | 11,12                                                  |
| <b>Limitations</b>       |     |                                                                                                                                                                                                              |                                                        |
| Interpretation           | 20  | Give a cautious overall interpretation of results considering objectives, limitations, multiplicity of analyses, results from similar studies, and other relevant evidence                                   | 13-18                                                  |
| Generalisability         | 21  | Discuss the generalisability (external validity) of the study results                                                                                                                                        | 17,18                                                  |
| <b>Other information</b> |     |                                                                                                                                                                                                              |                                                        |
| Funding                  | 22  | Give the source of funding and the role of the funders for the present study and, if applicable, for the original study on which the present article is based                                                | 3-4                                                    |

\*Give information separately for cases and controls in case-control studies and, if applicable, for exposed and unexposed groups in cohort and cross-sectional studies.



1  
2  
3  
4 **Note:** An Explanation and Elaboration article discusses each checklist item and gives methodological background and published examples of transparent reporting. The STROBE  
5 checklist is best used in conjunction with this article (freely available on the Web sites of PLoS Medicine at <http://www.plosmedicine.org/>, Annals of Internal Medicine at  
6 <http://www.annals.org/>, and Epidemiology at <http://www.epidem.com/>). Information on the STROBE Initiative is available at [www.strobe-statement.org](http://www.strobe-statement.org).  
7  
8  
9  
10  
11  
12  
13  
14  
15  
16  
17  
18  
19  
20  
21  
22  
23  
24  
25  
26  
27  
28  
29  
30  
31  
32  
33  
34  
35  
36  
37  
38  
39  
40  
41  
42  
43  
44  
45  
46  
47

For peer review only
