# Supplementary material for: Visual–motor integration and fine motor skills at 6½ years of age and associations with neonatal brain volumes in children born extremely preterm in Sweden: a population-based cohort study
Source: PubMed Central journal article supplement — BMJ Open. 2018 Feb 17;8(2):e020478. doi: 10.1136/bmjopen-2017-020478 (PMC5855250; doi:10.1136/bmjopen-2017-020478), 2018-02-17
Supplement: bmjopen-2017-020478supp003.pdf [file bmjopen-2017-020478supp003.pdf]

**Supplementary Table 2.** Characteristics of the children born at gestational age <27 weeks with and without atlas segmentation data.

|                                                    | <b>Atlas<br/>segmentation data<br/>n=26</b> | <b>No atlas<br/>segmentation data<br/>n=40</b> | <i>p</i> |
|----------------------------------------------------|---------------------------------------------|------------------------------------------------|----------|
| Gestational age at birth, weeks, median (range)    | 26.85 (23.4-26.6)                           | 25.50 (23.4-26.6)                              | 0.28     |
| Birth weight, grams, mean (SD)                     | 874 (153)                                   | 817 (146)                                      | 0.13     |
| Gender, girls/boys                                 | 13/13                                       | 16                                             | 0.46     |
| Small for gestational age, n                       | 0                                           | 4                                              | 0.15     |
| Prenatal steroids, n                               | 25/26                                       | 35                                             | 0.39     |
| Premature rupture of the membranes, n              | 7                                           | 12                                             | 1.00     |
| Cesarean Section, n                                | 10                                          | 22                                             | 0.22     |
| Sepsis, n                                          | 17                                          | 34                                             | 0.08     |
| Days of mechanical ventilation, median (range)     | 3 (0-36)                                    | 10 (0-55)                                      | 0.04     |
| Postnatal steroids, n                              | 3                                           | 8                                              | 0.51     |
| Bronchopulmonary Dysplasia, oxygen at 36 weeks, n  | 10                                          | 16                                             | 1.00     |
| Necrotizing enterocolitis, n                       | 0                                           | 6                                              | 0.07     |
| Patent ductus arteriosus, ligation, n              | 7                                           | 13                                             | 0.79     |
| Laser treatment for retinopathy of prematurity , n | 1                                           | 7                                              | 0.13     |
| Intraventricular hemorrhage grade I-II, n          | 7                                           | 16                                             | 0.30     |
| Mild white matter abnormality, n                   | 16                                          | 14                                             | 0.09     |
| Gestational age at MRI, weeks, median (range)      | 40.93 (39.71-43.28)                         | 40.36 (39.14-45.28)                            | 0.18     |
| Age at 6.5 year assessment, months, median (range) | 77.16 (75.29-80.20)                         | 77.23 (76.03-86.33)                            | 0.21     |
| VMI standard score, mean (SD)                      | 91.69 (14.14)                               | 89.82 (11.71)                                  | 0.87     |

|                                           |       |       |      |
|-------------------------------------------|-------|-------|------|
| M-ABC-2 manual dexterity score, mean (SD) | 7 (2) | 8 (3) | 0.38 |
|-------------------------------------------|-------|-------|------|

All children were without cerebral palsy, focal brain lesions or severe white matter abnormalities.

SD = Standard deviation, MRI = Magnetic Resonance Imaging, VMI=Visual-motor integration, M-ABC-2=Movement Assessment Battery for Children-2
