# Supplementary material for: Visual–motor integration and fine motor skills at 6½ years of age and associations with neonatal brain volumes in children born extremely preterm in Sweden: a population-based cohort study
Source: PubMed Central journal article supplement — BMJ Open. 2018 Feb 17;8(2):e020478. doi: 10.1136/bmjopen-2017-020478 (PMC5855250; doi:10.1136/bmjopen-2017-020478), 2018-02-17
Supplement: bmjopen-2017-020478supp004.pdf [file bmjopen-2017-020478supp004.pdf]

**Supplementary Table 3.** Correlations between brain volumes at term equivalent age, visual-motor integration and fine motor skills scores a 6.5 years in children born at GA <27 weeks.

| Brain region                   | Visual-motor integration            |              | Fine motor skills                   |              |
|--------------------------------|-------------------------------------|--------------|-------------------------------------|--------------|
|                                | Correlation coefficient (partial r) | p            | Correlation coefficient (partial r) | p            |
| Grey matter                    | 0.05                                | 0.77         | -0.38                               | <b>0.04</b>  |
| White matter                   | -0.33                               | 0.07         | 0.11                                | 0.57         |
| Deep grey matter               | 0.02                                | 0.93         | 0.05                                | 0.79         |
| Cerebellum                     | 0.24                                | 0.19         | 0.42                                | <b>0.02</b>  |
| Brain stem                     | 0.08                                | 0.66         | 0.47                                | <b>0.008</b> |
| Frontal lobe                   | -0.11                               | 0.61         | -0.19                               | 0.40         |
| Temporal lobe                  | -0.10                               | 0.63         | -0.12                               | 0.61         |
| Parietal lobe                  | -0.33                               | 0.12         | -0.22                               | 0.32         |
| Occipital lobe                 | 0.18                                | 0.40         | 0.26                                | 0.24         |
| Central Region                 | 0.35                                | 0.09         | 0.30                                | 0.17         |
| <b>Networks</b>                |                                     |              |                                     |              |
| <b>Visual network</b>          |                                     |              |                                     |              |
| Superior occipital gyrus       | 0.23                                | 0.28         | 0.39                                | 0.07         |
| Middle occipital gyrus         | 0.12                                | 0.59         | 0.06                                | 0.78         |
| Inferior occipital gyrus       | -0.26                               | 0.22         | -0.21                               | 0.35         |
| Calcarine cortex               | -0.24                               | 0.27         | -0.01                               | 0.97         |
| Cuneus                         | 0.27                                | 0.20         | 0.20                                | 0.37         |
| Lingual gyrus                  | -0.13                               | 0.54         | -0.01                               | 0.67         |
| <b>Motor network</b>           |                                     |              |                                     |              |
| Precentral gyrus               | 0.54                                | <b>0.007</b> | 0.54                                | <b>0.01</b>  |
| Frontal medial                 | 0.005                               | 0.99         | -0.05                               | 0.83         |
| Supplementary motor area       | -0.03                               | 0.89         | -0.19                               | 0.40         |
| <b>Sensory network</b>         |                                     |              |                                     |              |
| Postcentral gyrus              | 0.07                                | 0.75         | 0.17                                | 0.45         |
| <b>Salience network</b>        |                                     |              |                                     |              |
| Insula                         | -0.001                              | 0.99         | -0.08                               | 0.73         |
| Anterior cingulate gyrus       | 0.09                                | 0.67         | 0.10                                | 0.65         |
| Thalamus                       | -0.04                               | 0.87         | 0.11                                | 0.62         |
| Amygdala                       | -0.16                               | 0.45         | -0.23                               | 0.31         |
| <b>Default mode network</b>    |                                     |              |                                     |              |
| Precuneus                      | -0.26                               | 0.22         | -0.05                               | 0.84         |
| Angular_gyrus                  | 0.26                                | 0.21         | -0.17                               | 0.45         |
| Hippocampus                    | -0.08                               | 0.72         | -0.11                               | 0.63         |
| <b>Subcortical regions</b>     |                                     |              |                                     |              |
| Subcortical grey matter, total | -0.10                               | 0.63         | -0.04                               | 0.86         |
| Pallidum                       | 0.01                                | 0.99         | 0.07                                | 0.76         |

|         |       |      |       |      |
|---------|-------|------|-------|------|
| Caudate | -0.04 | 0.85 | -0.09 | 0.70 |
| Putamen | -0.26 | 0.23 | 0.06  | 0.79 |

All children are without cerebral palsy or major brain lesions. Results from Pearson's partial correlation, adjusted for total cerebral parenchyma (total cortical grey and white matter) and sex. Central region = precentral and postcentral gyri, rolandic operculum bilaterally. Results are presented without correction for multiple comparisons.
